# Supplementary material for: Array-Based DNA Methylation Profiling for Breast Cancer Subtype Discrimination
Source: PLoS One. 2010 Sep 7;5(9):e12616. doi: 10.1371/journal.pone.0012616 (PMC2935385; doi:10.1371/journal.pone.0012616)
Supplement: Table S1 — (0.24 MB XLS) [file pone.0012616.s004.xls]

## Sheet: GenesNormalTumor.txt
Genes differentially methylated between normal breast tissues and breast tumors
CpG locus	Gene	Mean breast tumors	S.D.	Mean normal breast tissue	S.D.	delta beta-value
cg09649610	GNG4	0.656812	0.214496	0.119809	0.0339467	0.537002
cg23391785	DNM3	0.613085	0.272327	0.0826161	0.034781	0.530469
cg25802093	SPAG6	0.634889	0.17418	0.161306	0.0630779	0.473583
cg22881914	NID2	0.558841	0.221491	0.085589	0.0574388	0.473252
cg18952647	BNC1	0.542249	0.190909	0.072387	0.0292266	0.469862
cg11052143	ALS2CR11	0.616163	0.158149	0.147199	0.0195441	0.468964
cg25720804	TLX3	0.571318	0.230801	0.109049	0.0429888	0.46227
cg08047907	C1orf114	0.530441	0.187571	0.0701169	0.0234235	0.460324
cg14652095	HIST1H1A	0.71327	0.172124	0.25952	0.0839283	0.453751
cg01335367	C12orf34	0.609671	0.201188	0.159208	0.0674573	0.450464
cg09643544	ZNF177	0.534494	0.193553	0.0841003	0.0314592	0.450394
cg00489401	FLT4	0.635877	0.139938	0.189546	0.0582136	0.446332
cg23290344	NEF3	0.515332	0.196739	0.0731009	0.0311129	0.442231
cg02164046	SST	0.513216	0.192483	0.084103	0.0175364	0.429113
cg05436658	PRKCB1	0.457215	0.201682	0.0322055	0.0062629	0.425009
cg26521404	HOXA9	0.588435	0.210285	0.163592	0.0883082	0.424843
cg00949442	ABCA3	0.610775	0.221342	0.186944	0.054271	0.423831
cg25764191	INA	0.501297	0.198211	0.0784532	0.0415043	0.422844
cg06274159	ZFP42	0.544346	0.245506	0.122272	0.0277455	0.422074
cg18691434	GPC2	0.486701	0.253003	0.0666891	0.0208107	0.420012
cg13958426	C1orf114	0.507008	0.191216	0.0873098	0.0253403	0.419698
cg08097882	POU4F1	0.453991	0.265476	0.0359167	0.00885884	0.418074
cg07703401	HBQ1	0.521043	0.197737	0.104832	0.0314923	0.416211
cg22815110	FOXD3	0.483485	0.232486	0.0688116	0.024169	0.414673
cg09427311	ANGPTL2	0.576869	0.183724	0.162444	0.0369532	0.414425
cg12680609	ZFP41	0.567917	0.180225	0.153905	0.0475457	0.414012
cg03975694	ZNF540	0.531904	0.170087	0.118492	0.0229505	0.413412
cg21870884	GPR25	0.556015	0.20292	0.143923	0.0691961	0.412092
cg01295203	PRDM14	0.459566	0.251445	0.048664	0.0148372	0.410902
cg15748507	PRLHR	0.617777	0.148872	0.208498	0.0468907	0.409279
cg17410236	FLRT2	0.444861	0.261031	0.0359488	0.0137556	0.408912
cg13801416	AKR1B1	0.439221	0.260303	0.030426	0.0064198	0.408795
cg10303487	DPYS	0.4587	0.228093	0.0511453	0.0230451	0.407555
cg13282837	TCL1A	0.669445	0.189011	0.263616	0.0802561	0.405829
cg18236477	ATP8A2	0.515788	0.188782	0.112398	0.0397089	0.40339
cg23710218	MSC	0.534348	0.158227	0.134232	0.0321699	0.400116
cg17861230	PDE4C	0.596349	0.178791	0.196239	0.0461004	0.400111
cg27120999	HSPA2	0.749195	0.165892	0.353177	0.110944	0.396017
cg10883303	HOXA13	0.47731	0.246334	0.0825456	0.0208921	0.394764
cg12619509	DNASE1L2	0.721028	0.171852	0.331705	0.101227	0.389323
cg19067730	PPGB	0.455802	0.214413	0.0684735	0.0307045	0.387329
cg09053680	UTF1	0.490295	0.240734	0.103262	0.0490554	0.387033
cg27188703	FAIM2	0.598103	0.249038	0.216039	0.10524	0.382064
cg01550148	H2AFY	0.64455	0.157745	0.262506	0.032179	0.382044
cg08260891	PPGB	0.437848	0.20596	0.0562636	0.024534	0.381584
cg14991487	HOXD9	0.438722	0.263135	0.0573651	0.0229776	0.381357
cg25908985	IHH	0.445242	0.25868	0.0639844	0.00720874	0.381258
cg11394785	LTC4S	0.572323	0.202923	0.1914	0.0413745	0.380923
cg00548268	NPTX2	0.673579	0.129741	0.292754	0.0372682	0.380825
cg03943081	TCERG1L	0.432516	0.220884	0.0518911	0.00805631	0.380625
cg03355526	ZNF454	0.498086	0.22185	0.11884	0.0498173	0.379246
cg05521696	SLC2A14	0.453717	0.187487	0.0760455	0.0164947	0.377671
cg25942450	TLX3	0.472463	0.185938	0.0976735	0.0299773	0.374789
cg04378886	RCN3	0.602672	0.248676	0.228366	0.0557498	0.374306
cg04598121	PENK	0.531449	0.133826	0.157428	0.0394814	0.37402
cg04534765	GALR1	0.48441	0.197827	0.111662	0.041494	0.372748
cg25902889	FSD1	0.694058	0.154596	0.323504	0.0368371	0.370554
cg19594666	LEP	0.687426	0.133833	0.319848	0.0534638	0.367578
cg04330449	NEUROG1	0.53576	0.228268	0.168905	0.053695	0.366855
cg05358404	RTEL1	0.585747	0.167669	0.219166	0.0615068	0.366581
cg02250594	ONECUT2	0.500327	0.225479	0.133763	0.0348856	0.366564
cg08089301	HOXB4	0.414395	0.283611	0.0480241	0.0456978	0.366371
cg17706173	C16orf30	0.533364	0.165224	0.168557	0.0392094	0.364807
cg03734874	FLJ42486	0.507712	0.206935	0.144179	0.0549069	0.363533
cg23037403	ZNF454	0.455255	0.203727	0.0923961	0.0372835	0.362858
cg08118311	SALL3	0.41248	0.184807	0.0507149	0.0314787	0.361765
cg08572611	ACTL6B	0.447027	0.233597	0.0853357	0.0268025	0.361691
cg04317399	HOXA4	0.552105	0.17373	0.193349	0.0930026	0.358757
cg12374721	PRAC	0.547656	0.220652	0.190045	0.0254332	0.357612
cg22660578	LHX1	0.500286	0.178967	0.143995	0.0288161	0.356291
cg27223047	FBN2	0.491415	0.182257	0.135244	0.0286991	0.356172
cg22471346	GAS7	0.401668	0.225689	0.0455391	0.0092922	0.356129
cg17188046	T	0.419161	0.188053	0.0636797	0.00817435	0.355482
cg06908778	SPAG6	0.497842	0.184126	0.1433	0.0236891	0.354541
cg10660256	BHMT	0.58602	0.158869	0.23165	0.0692359	0.35437
cg19466563	SPARCL1	0.574283	0.119743	0.219971	0.0500363	0.354312
cg18815943	FOXE3	0.402968	0.243639	0.0500141	0.018522	0.352954
cg24335895	COX7A1	0.551063	0.150134	0.198344	0.0531107	0.352718
cg22809047	RPL31	0.502783	0.192583	0.150622	0.0246622	0.352161
cg01354473	HOXA9	0.531283	0.22058	0.182137	0.0632665	0.349146
cg01381846	HOXA9	0.570466	0.224984	0.221725	0.0521531	0.348741
cg23316360	EDNRB	0.436362	0.19489	0.0879617	0.0290743	0.3484
cg17703212	DYDC1	0.546126	0.198273	0.200163	0.0471994	0.345963
cg18956481	CYP24A1	0.432274	0.235698	0.0875396	0.0114461	0.344734
cg06263495	ASCL2	0.41722	0.277947	0.0743242	0.0179099	0.342895
cg17788832	PSKH2	0.587743	0.177823	0.24599	0.0809499	0.341754
cg16708981	ZNF677	0.395104	0.205282	0.053767	0.0175584	0.341337
cg06637774	P2RY6	0.499886	0.248051	0.15921	0.0353157	0.340676
cg23051664	TNFRSF10D	0.396503	0.280883	0.0560035	0.0114834	0.3405
cg20959866	AJAP1	0.482148	0.177384	0.142119	0.0909709	0.340029
cg26186727	NETO1	0.448994	0.162552	0.109249	0.0389339	0.339745
cg10266490	ACOT11	0.444615	0.164986	0.104959	0.0312728	0.339657
cg19884658	KLHL21	0.499572	0.193264	0.160464	0.0450819	0.339108
cg18055007	DDAH2	0.488338	0.186242	0.150769	0.0447681	0.337569
cg02351381	C12orf34	0.541925	0.142042	0.204515	0.0434683	0.33741
cg22783363	TNFRSF10D	0.383586	0.211764	0.0468095	0.0212226	0.336776
cg26128092	WDR8	0.517988	0.151916	0.181995	0.0490739	0.335993
cg25691167	FERD3L	0.381506	0.219552	0.0455806	0.0111861	0.335925
cg12727795	PDGFRB	0.439756	0.244196	0.104831	0.0279711	0.334925
cg13577076	PRKAR1B	0.430912	0.238144	0.0961276	0.0269451	0.334784
cg15584813	SLC38A4	0.435374	0.211235	0.101206	0.0581432	0.334167
cg06710648	DAB1	0.565573	0.147726	0.232314	0.0725302	0.333259
cg23207990	SFRP2	0.421686	0.195669	0.0889599	0.0311371	0.332726
cg17241310	BARHL2	0.439477	0.174604	0.107059	0.0447321	0.332417
cg21238818	GAL3ST3	0.446634	0.197989	0.114909	0.0620458	0.331725
cg06291867	HTR7	0.4475	0.18083	0.116392	0.024696	0.331108
cg07846220	LAMA1	0.426645	0.243849	0.0961247	0.0477524	0.330521
cg18081258	NDRG2	0.504491	0.14323	0.175089	0.0459926	0.329402
cg14008883	SLC18A3	0.46765	0.149526	0.138317	0.0316746	0.329333
cg08668790	ZNF154	0.428844	0.2221	0.0998972	0.0378565	0.328947
cg09952204	RASGRF2	0.376512	0.21747	0.0479207	0.0207627	0.328591
cg03755123	UTF1	0.464741	0.155547	0.136154	0.0431679	0.328587
cg11947493	TNFRSF10D	0.42505	0.183141	0.0964794	0.0344893	0.32857
cg18416881	AKR1B1	0.363349	0.223544	0.0349745	0.00708637	0.328375
cg10964421	TNFRSF10D	0.433952	0.22443	0.106584	0.0192308	0.327368
cg21271753	TMPRSS6	0.464862	0.163372	0.137612	0.0279915	0.32725
cg23282559	KL	0.457149	0.147564	0.130302	0.0532215	0.326847
cg11452221	GEFT	0.468649	0.156417	0.1426	0.0330186	0.326049
cg18555440	MYOD1	0.449288	0.149289	0.123378	0.033397	0.325911
cg14826456	ADRB1	0.53241	0.20432	0.206559	0.0822317	0.325851
cg02254461	AXUD1	0.732127	0.127348	0.406395	0.0519586	0.325732
cg11438428	PTF1A	0.411187	0.25501	0.0859505	0.030294	0.325236
cg18674980	CA3	0.44438	0.158861	0.119435	0.0375533	0.324945
cg18671950	FBN1	0.366131	0.23942	0.0412202	0.0096232	0.324911
cg19018097	FLJ30934	0.352203	0.199641	0.027433	0.0081736	0.32477
cg19885761	CPLX2	0.471592	0.206179	0.147211	0.0389413	0.32438
cg08109815	NMBR	0.49095	0.135221	0.167213	0.0204923	0.323737
cg15780361	ALS2CR11	0.696731	0.120677	0.373217	0.0474235	0.323514
cg02748539	SLC9A3	0.385987	0.226212	0.0627158	0.0345373	0.323271
cg01114088	CYTL1	0.428078	0.215505	0.105383	0.0319054	0.322694
cg06572160	KCNC3	0.464581	0.185683	0.142427	0.104016	0.322153
cg18420965	EPHA5	0.389657	0.23202	0.0678395	0.0146068	0.321818
cg11935147	PDE4DIP	0.481879	0.184702	0.161956	0.0318256	0.319923
cg27389185	ZNF540	0.483515	0.12834	0.163817	0.0262156	0.319698
cg17525406	AJAP1	0.377493	0.274639	0.0585067	0.0207427	0.318986
cg20291049	POU3F3	0.507742	0.211875	0.18942	0.0339099	0.318322
cg21243096	POU3F1	0.40908	0.181239	0.0912968	0.0265544	0.317783
cg15191648	SALL3	0.485726	0.159767	0.168285	0.0822177	0.317441
cg08768421	GDA	0.370127	0.211636	0.0530493	0.0118469	0.317078
cg15448245	GGTLA1	0.556991	0.13582	0.239917	0.0399671	0.317075
cg11657808	RYR2	0.37374	0.279513	0.0569633	0.0193865	0.316776
cg22533573	WT1	0.390323	0.206519	0.0735648	0.0295927	0.316758
cg21949305	ADORA2A	0.701516	0.136069	0.386185	0.0356462	0.315332
cg16428251	SOX14	0.403501	0.15401	0.0883615	0.0191612	0.31514
cg20798152	CART	0.562788	0.126677	0.248384	0.0434611	0.314404
cg09260089	NKX6-2	0.356596	0.209279	0.0424536	0.0101082	0.314143
cg13323752	SLC2A14	0.3406	0.207214	0.0278038	0.0133173	0.312796
cg12448933	RAB37	0.362277	0.207929	0.0495598	0.015261	0.312718
cg05158615	NPY	0.429599	0.171767	0.11711	0.0350604	0.31249
cg07717632	FLJ20245	0.585777	0.198731	0.273288	0.091056	0.312489
cg15528736	FCGRT	0.397416	0.191079	0.0850049	0.0360365	0.312411
cg20640433	LAMA2	0.387167	0.238777	0.0747989	0.01985	0.312368
cg08942800	CRISP2	0.683517	0.148465	0.371636	0.0563086	0.311881
cg19280968	PPP1R2	0.410109	0.203283	0.0983093	0.0207003	0.3118
cg23432345	HOXA7	0.354838	0.232064	0.0430755	0.00851739	0.311763
cg02192520	RDH5	0.562428	0.169496	0.251245	0.0448316	0.311183
cg27635271	SH3PX3	0.496087	0.170577	0.185082	0.0214702	0.311005
cg23559331	KCNH4	0.344232	0.256692	0.0337219	0.00804522	0.310511
cg18267374	NEF3	0.348167	0.206997	0.0382518	0.0100422	0.309915
cg13262687	POU4F2	0.412815	0.168924	0.103375	0.0144573	0.30944
cg14859460	GRM6	0.383284	0.221936	0.0753507	0.0189138	0.307934
cg23300372	CART	0.361855	0.239856	0.0541268	0.009517	0.307728
cg26189983	TNFRSF1B	0.399699	0.179563	0.0920788	0.015219	0.30762
cg02008154	TBX20	0.387293	0.193876	0.0797962	0.0233586	0.307497
cg24315815	PLSCR4	0.579195	0.16361	0.271969	0.0361205	0.307226
cg20427865	CX3CL1	0.485969	0.139459	0.178844	0.0340993	0.307125
cg10143146	COL11A2	0.408914	0.152667	0.101808	0.0327651	0.307106
cg14137939	FLJ38159	0.528405	0.187675	0.221472	0.0624195	0.306933
cg11902458	KCNN3	0.386793	0.209526	0.0805321	0.0194278	0.306261
cg10742801	PRAP1	0.473358	0.201671	0.167205	0.0449255	0.306153
cg04048259	EDN3	0.39464	0.216899	0.0885545	0.0280102	0.306086
cg09009111	EMILIN2	0.348286	0.229824	0.0431851	0.016937	0.305101
cg02085507	TRIP10	0.502846	0.191462	0.198057	0.060399	0.30479
cg27409364	KCNC1	0.632582	0.114679	0.32806	0.0740127	0.304522
cg04527918	UCN	0.751756	0.159009	0.447297	0.0709356	0.304459
cg14380517	BTG3	0.374487	0.201574	0.0700651	0.0104662	0.304421
cg06971096	PTPRN	0.457266	0.145674	0.153608	0.030531	0.303658
cg07237939	SLC22A3	0.371566	0.169608	0.0679524	0.0279977	0.303613
cg07903918	GABBR2	0.346032	0.236151	0.0426721	0.00600104	0.30336
cg26162582	KCNA6	0.400448	0.233827	0.0971345	0.0226231	0.303313
cg08261094	SFRP4	0.380696	0.242084	0.0776349	0.0255733	0.303062
cg23189044	KCNE3	0.381322	0.19171	0.079144	0.0304452	0.302178
cg01561916	HAAO	0.332065	0.300776	0.0302054	0.0029934	0.30186
cg24130010	CHODL	0.459301	0.189125	0.157528	0.0282937	0.301773
cg03699566	FOLR1	0.663019	0.100862	0.361483	0.0324106	0.301537
cg03483626	KCNA3	0.515648	0.142609	0.214342	0.114276	0.301306
cg07307078	TUBB6	0.532973	0.202306	0.23173	0.141137	0.301243
cg20483374	C1QTNF5	0.452338	0.207086	0.151143	0.0384621	0.301195
cg01767116	FBXL22	0.549089	0.130146	0.248124	0.061491	0.300966
cg15843823	ALOX15	0.378352	0.186237	0.0777821	0.021845	0.30057
cg19064258	HS3ST2	0.394834	0.19085	0.0945063	0.0229224	0.300327
cg16254309	CNTNAP2	0.39609	0.192749	0.0965299	0.0171346	0.299561
cg18877506	PDPN	0.329148	0.229575	0.0301027	0.0054721	0.299046
cg10486998	GALR1	0.38824	0.194022	0.0894418	0.0166569	0.298798
cg17108819	CD8A	0.336655	0.266076	0.0380986	0.0132463	0.298556
cg03882305	TRIM50C	0.634009	0.197297	0.335456	0.0907708	0.298553
cg07845392	SLC25A10	0.533808	0.179535	0.235736	0.0495341	0.298072
cg09243021	CASP2	0.522321	0.190669	0.224436	0.0320086	0.297885
cg22598028	ZNF660	0.354126	0.232366	0.0570931	0.018424	0.297033
cg00540769	ACOT12	0.530049	0.151274	0.233069	0.0487438	0.29698
cg11812218	GHSR	0.339829	0.210724	0.0435091	0.013794	0.29632
cg23130254	HOXD12	0.434869	0.159139	0.139299	0.044501	0.29557
cg06638451	FAM107A	0.506609	0.169095	0.211153	0.0675566	0.295456
cg10541755	EIF5A2	0.361214	0.226682	0.0658413	0.012562	0.295372
cg07084163	UGT3A2	0.416436	0.164418	0.121111	0.0177731	0.295326
cg17586860	SSTR4	0.475581	0.183738	0.180494	0.0367456	0.295088
cg26620157	PAX9	0.573633	0.165363	0.278674	0.065606	0.294959
cg11319389	C20orf100	0.383371	0.176931	0.0886198	0.0259858	0.294751
cg11368643	PCDHB15	0.469433	0.16223	0.17515	0.0502628	0.294283
cg04034767	GRASP	0.358941	0.306183	0.0647347	0.00976033	0.294206
cg10300684	FOXG1B	0.395451	0.172933	0.102115	0.0141699	0.293336
cg27626299	EVX1	0.466142	0.161488	0.172957	0.0391889	0.293185
cg08876932	PHOX2A	0.340647	0.175902	0.0476313	0.0113256	0.293015
cg15494458	BPI	0.478589	0.155124	0.185887	0.033504	0.292702
cg18794577	GRIN3A	0.369997	0.237252	0.0773819	0.0119062	0.292615
cg15787039	SGNE1	0.550953	0.134601	0.258859	0.0657097	0.292094
cg07186138	APOBEC3C	0.451412	0.171157	0.159463	0.0213978	0.29195
cg15873301	SYN2	0.374862	0.200328	0.0830071	0.0301444	0.291855
cg18182399	DES	0.410874	0.198221	0.119734	0.0502471	0.29114
cg22359606	NEUROD1	0.396322	0.173212	0.105323	0.0223394	0.290998
cg17279839	RARRES2	0.477674	0.113699	0.187101	0.0574213	0.290574
cg19774122	LAMA2	0.427324	0.190326	0.136902	0.0203517	0.290422
cg02994956	NEFH	0.563728	0.11343	0.273407	0.0354263	0.290321
cg16652063	SLC13A5	0.380229	0.203011	0.0900125	0.0167268	0.290216
cg01169778	GBGT1	0.852681	0.100563	0.562637	0.0921791	0.290044
cg19006008	F2RL3	0.452557	0.187816	0.162868	0.0543469	0.289689
cg24628744	H2AFY	0.465929	0.130638	0.17646	0.022989	0.289469
cg04797323	SOCS2	0.353297	0.277879	0.0638696	0.0242364	0.289427
cg06092815	SKIP	0.441535	0.163608	0.152252	0.0375994	0.289283
cg26609631	GSH1	0.429382	0.198457	0.14116	0.0572006	0.288222
cg05221167	ZNF560	0.324451	0.188074	0.0366122	0.00584157	0.287839
cg16970232	APC	0.358406	0.27892	0.0706235	0.0218524	0.287782
cg06151165	VSX1	0.341136	0.187616	0.053836	0.0127547	0.2873
cg07197059	EFS	0.463454	0.195464	0.176789	0.0447194	0.286665
cg17688525	L3MBTL4	0.357574	0.247948	0.07095	0.044779	0.286624
cg02330106	MGMT	0.565249	0.181793	0.278643	0.0613047	0.286606
cg25115460	TP73	0.86952	0.101446	0.58299	0.0369322	0.28653
cg09061733	SERPING1	0.585705	0.106102	0.299699	0.0529052	0.286006
cg25228126	FZD2	0.39225	0.179676	0.106345	0.0443411	0.285905
cg21229055	GPM6B	0.448482	0.195545	0.163321	0.0508166	0.285162
cg12601757	ST6GALNAC3	0.324269	0.274209	0.0391135	0.0115197	0.285155
cg18601426	PTPRN2	0.494592	0.137847	0.209994	0.0555643	0.284597
cg04315771	IL4I1	0.50482	0.13508	0.220916	0.0576615	0.283904
cg05822532	ELN	0.380442	0.259032	0.0965417	0.0264833	0.283901
cg00333226	UNQ739	0.381141	0.164717	0.0976586	0.0238118	0.283482
cg16232126	SLC5A7	0.37923	0.179289	0.0961324	0.0197532	0.283098
cg17619823	ADRB3	0.33327	0.219787	0.0501996	0.0102358	0.283071
cg01185080	ZNF710	0.552206	0.189236	0.269261	0.0494496	0.282945
cg12335708	DPP4	0.400715	0.246193	0.117827	0.0249548	0.282888
cg20831708	SEC31L2	0.781354	0.129151	0.498881	0.0910683	0.282473
cg22719623	OPRM1	0.488376	0.150388	0.205914	0.0282017	0.282462
cg03160135	VGLL2	0.382908	0.15189	0.10106	0.0210064	0.281849
cg18722841	PHOX2A	0.353551	0.177123	0.071736	0.0113776	0.281815
cg05373457	KCNS2	0.451229	0.157364	0.169433	0.0347079	0.281796
cg01965939	SH3TC2	0.419718	0.199505	0.138075	0.0446438	0.281643
cg15127733	HSPA12B	0.676496	0.160918	0.39504	0.0670928	0.281456
cg07778029	HOXA9	0.315085	0.208173	0.0336956	0.0131327	0.281389
cg20792062	KCNA5	0.42816	0.158608	0.146899	0.0274362	0.28126
cg04263186	TACR3	0.397549	0.17347	0.116327	0.0332401	0.281222
cg26599006	GSCL	0.335523	0.233267	0.0544854	0.0242446	0.281037
cg20339230	ST8SIA2	0.313653	0.248133	0.0327114	0.0175934	0.280942
cg17860158	CNTN2	0.420921	0.193416	0.140192	0.0261835	0.280729
cg11934695	ADRA1D	0.368308	0.204812	0.088131	0.027328	0.280177
cg12351433	LHCGR	0.448891	0.217018	0.169218	0.0447804	0.279672
cg01240931	APC	0.560731	0.146867	0.281839	0.0682061	0.278892
cg04062391	ZNF560	0.344147	0.208954	0.0655915	0.0234489	0.278555
cg20114394	FSTL1	0.722966	0.0816947	0.444422	0.0337304	0.278543
cg00970325	PAQR9	0.374268	0.183039	0.0959031	0.0125363	0.278365
cg02681442	FOXG1B	0.357535	0.156428	0.0793141	0.0172211	0.278221
cg12799895	NPTX2	0.54406	0.101431	0.266209	0.093568	0.277851
cg24169822	HOXA4	0.485889	0.139538	0.208096	0.0464973	0.277794
cg15791248	FGFR1	0.678754	0.103672	0.401162	0.0431485	0.277592
cg08209133	SLC10A4	0.423457	0.158063	0.145913	0.0283658	0.277545
cg13234863	KIAA1944	0.374349	0.178075	0.0969678	0.0241904	0.277381
cg19904463	FABP5	0.357116	0.181526	0.079779	0.0205422	0.277337
cg09873258	DLK1	0.635277	0.1515	0.358128	0.0629698	0.277149
cg22165175	KCNA2	0.423765	0.163839	0.146802	0.0748741	0.276963
cg21410991	ISL1	0.399199	0.158404	0.122349	0.0330857	0.27685
cg13749822	HHIP	0.378368	0.178184	0.10217	0.0280274	0.276198
cg02672493	TMEM22	0.418046	0.181621	0.14185	0.0498215	0.276195
cg11004890	SLC4A11	0.538806	0.173249	0.262635	0.0682554	0.276171
cg06193397	ENPP2	0.443352	0.162294	0.167232	0.0359594	0.276121
cg13912117	ADCY8	0.304977	0.261756	0.0288725	0.0100539	0.276105
cg06566994	ZNF167	0.687193	0.091984	0.41136	0.0402974	0.275833
cg22123464	SLC8A2	0.418553	0.155413	0.14291	0.01741	0.275643
cg03874199	HOXD12	0.322145	0.201117	0.0465572	0.0179188	0.275588
cg08788717	STK33	0.309815	0.230343	0.0342769	0.0067248	0.275538
cg02620013	MLNR	0.471549	0.173134	0.196337	0.0271683	0.275212
cg14458834	HOXB4	0.350336	0.260405	0.0754377	0.0111312	0.274899
cg00565688	TP73	0.48175	0.171242	0.207121	0.0932005	0.274629
cg08519905	CD9	0.442706	0.139781	0.168119	0.0316809	0.274588
cg02409351	CART1	0.338049	0.200235	0.0637228	0.014167	0.274326
cg01777397	RSNL2	0.397251	0.211218	0.123251	0.0293367	0.274
cg21965997	DRD1IP	0.319985	0.190444	0.0462529	0.0159932	0.273732
cg12699371	GALR1	0.341464	0.175855	0.0680004	0.0107519	0.273463
cg21087137	MGC26856	0.334871	0.192408	0.0620651	0.0409633	0.272806
cg12091331	PLAT	0.442468	0.187417	0.1697	0.0283112	0.272768
cg13398291	SFRP1	0.30844	0.246032	0.0359259	0.0119474	0.272514
cg02248486	HOXA5	0.538183	0.181901	0.265942	0.0515513	0.272241
cg21554552	RASSF1	0.369051	0.186723	0.0968126	0.105237	0.272239
cg21096399	MCAM	0.42228	0.213441	0.150455	0.0224795	0.271825
cg06277657	DGKI	0.521988	0.196648	0.250562	0.0696995	0.271426
cg03400060	BHMT2	0.537464	0.174503	0.26604	0.0730495	0.271424
cg22187630	CACNA1A	0.366243	0.16541	0.094868	0.0241393	0.271375
cg20023231	HS3ST2	0.328473	0.207839	0.0574317	0.0190789	0.271041
cg12768605	LYPD5	0.358515	0.18103	0.0880113	0.0197288	0.270504
cg15343119	GALR1	0.382553	0.183153	0.112067	0.0170892	0.270486
cg12717594	RECK	0.296321	0.223157	0.0260652	0.00592447	0.270256
cg00995520	KCNA3	0.536203	0.114952	0.266147	0.0804313	0.270056
cg17471928	STAC2	0.339688	0.211941	0.0696961	0.0129991	0.269992
cg27504991	CUL7	0.66643	0.125386	0.397072	0.0336361	0.269358
cg22197830	C5orf14	0.568519	0.144499	0.299413	0.0398444	0.269106
cg18159180	CUL7	0.50246	0.14828	0.233423	0.019951	0.269037
cg23097006	VSX1	0.404326	0.203306	0.135714	0.0247473	0.268612
cg10235817	ADRA2C	0.465228	0.155782	0.197001	0.0485284	0.268227
cg24715245	UCHL1	0.34971	0.230074	0.0816733	0.0164275	0.268037
cg19063972	SOX21	0.306538	0.208276	0.0385047	0.0103303	0.268033
cg23089840	LRRC3	0.456305	0.156243	0.188593	0.0287692	0.267713
cg08578734	GRIA1	0.389287	0.179832	0.121759	0.0307194	0.267527
cg23495733	CPNE8	0.320337	0.194295	0.0529088	0.0112467	0.267429
cg07572341	FOXA2	0.355519	0.185258	0.0881048	0.0328908	0.267414
cg23317501	UGT3A1	0.38431	0.135591	0.117331	0.019413	0.266979
cg12741420	IRF4	0.295887	0.181786	0.0289349	0.00675075	0.266952
cg11389172	SLC18A3	0.341656	0.217864	0.0749581	0.0500041	0.266698
cg03365437	ALDH1A2	0.384408	0.180807	0.11782	0.0269168	0.266588
cg20366906	PCDH8	0.435499	0.135062	0.168957	0.0396661	0.266542
cg05194726	NRIP2	0.441495	0.17379	0.175341	0.0415521	0.266154
cg10140638	PTPRN	0.31709	0.197126	0.0514566	0.0167396	0.265633
cg15720535	AGPAT2	0.53849	0.194242	0.27293	0.0498913	0.26556
cg10647513	HBA1	0.367667	0.14351	0.102374	0.0192645	0.265293
cg23694248	PTPRR	0.375691	0.179662	0.110445	0.0254573	0.265246
cg25465406	GUCY2D	0.378521	0.175922	0.113324	0.0159734	0.265197
cg20903926	C1orf177	0.849885	0.0627333	0.58483	0.0408828	0.265056
cg24127874	HES6	0.436489	0.222602	0.171511	0.0339297	0.264978
cg24641352	ZFP41	0.692972	0.146992	0.428116	0.0757163	0.264856
cg10957151	HOXD9	0.391164	0.170719	0.126547	0.0669965	0.264618
cg11354906	SFRP2	0.332723	0.178807	0.0681627	0.00783917	0.264561
cg23642747	INA	0.371052	0.162531	0.106526	0.0213005	0.264526
cg24826867	IRF8	0.308959	0.216266	0.0444558	0.0123977	0.264503
cg02506908	HPD	0.630627	0.142676	0.366317	0.0446253	0.26431
cg15250797	SCTR	0.36452	0.174724	0.100472	0.0238797	0.264049
cg19697981	NR2E1	0.367807	0.163478	0.103945	0.0369376	0.263862
cg21504624	IL11RA	0.385491	0.153227	0.121743	0.0274037	0.263748
cg17651821	HIST1H4L	0.381692	0.209175	0.118257	0.0398314	0.263435
cg06675478	SOX1	0.477937	0.129651	0.214634	0.0662331	0.263303
cg11670211	NOX4	0.319926	0.191694	0.0567406	0.0161349	0.263185
cg05396987	FLJ30834	0.323278	0.160614	0.0602224	0.0116249	0.263055
cg00930873	ALDH1A2	0.314672	0.199903	0.0516252	0.0152442	0.263047
cg03743584	PRAP1	0.312233	0.17793	0.0491909	0.0147213	0.263042
cg05222924	WT1	0.326124	0.240323	0.0634958	0.0144664	0.262628
cg23326689	STMN2	0.497798	0.174982	0.235401	0.0354856	0.262397
cg15043057	CTPS	0.399512	0.220516	0.137335	0.0270233	0.262177
cg17503456	FOXL2	0.296641	0.24705	0.0344823	0.00855817	0.262159
cg15674997	GRM6	0.461329	0.154043	0.199201	0.061092	0.262128
cg23092823	PODN	0.309659	0.191771	0.0477865	0.0109949	0.261873
cg19988449	BNC1	0.324603	0.207639	0.0628033	0.0142266	0.2618
cg00995327	CHST2	0.305673	0.266533	0.0439835	0.00591489	0.261689
cg02055963	CDX2	0.352652	0.168412	0.0912764	0.0272027	0.261376
cg21012874	SNCG	0.487586	0.181316	0.226427	0.0500112	0.26116
cg07658590	SLC19A1	0.530883	0.141083	0.269842	0.0645979	0.261041
cg24989962	PTGDR	0.526779	0.170885	0.265796	0.036225	0.260983
cg07054641	WDR52	0.651467	0.164018	0.390611	0.0603692	0.260856
cg13870866	TBX20	0.459316	0.188193	0.199213	0.0500894	0.260103
cg21116314	ZNF266	0.539817	0.152939	0.280503	0.0542713	0.259315
cg18879041	LIMS3	0.630737	0.0825344	0.371607	0.0560531	0.25913
cg00662556	GALR1	0.383896	0.158012	0.125446	0.0160109	0.25845
cg26125600	PF4V1	0.407759	0.183859	0.149347	0.0336354	0.258412
cg13870494	MAMDC2	0.517336	0.129718	0.259004	0.0350997	0.258332
cg16092786	WT1	0.299497	0.19255	0.0414519	0.0102709	0.258046
cg14419187	C2orf21	0.333973	0.222224	0.0764317	0.0128769	0.257541
cg18397523	EVX1	0.370923	0.165974	0.11352	0.0273767	0.257403
cg18482268	POU4F3	0.336212	0.186508	0.0789417	0.0208391	0.25727
cg16263182	HBA2	0.347082	0.132728	0.0902893	0.0165889	0.256793
cg17063929	NOX4	0.473288	0.146228	0.216643	0.0622091	0.256645
cg02780849	GNG4	0.424037	0.139245	0.167511	0.0355288	0.256526
cg20404387	FAM43B	0.331376	0.212685	0.0749332	0.0180057	0.256443
cg07601320	SLC38A4	0.466555	0.154226	0.210289	0.0526724	0.256266
cg04623955	DIO3	0.357645	0.185563	0.10166	0.0204956	0.255985
cg18350391	IL32	0.55281	0.167321	0.297124	0.0540898	0.255686
cg07730329	PCDHGA12	0.400458	0.137783	0.144873	0.0230142	0.255585
cg10362475	SHANK2	0.733087	0.151076	0.477552	0.0990487	0.255534
cg05937453	SFRP5	0.305189	0.236871	0.0497096	0.0103839	0.25548
cg23887396	SARM1	0.310333	0.205549	0.0552467	0.0136737	0.255086
cg03557698	C1orf177	0.899742	0.0632968	0.644794	0.0562276	0.254948
cg07260592	LPA	0.499582	0.173516	0.244692	0.0675628	0.25489
cg16361890	LTC4S	0.518293	0.109046	0.26375	0.0460653	0.254543
cg10539507	NKX6-1	0.350376	0.194731	0.0960069	0.0218901	0.254369
cg10257049	C5orf4	0.38385	0.171178	0.129499	0.0562789	0.254352
cg16098981	C20orf39	0.311726	0.20864	0.0574722	0.0116619	0.254254
cg14918082	KCNAB3	0.780801	0.119837	0.52661	0.0663362	0.254191
cg13053608	LGP1	0.623787	0.129566	0.36971	0.0479963	0.254077
cg22224704	GSTP1	0.385544	0.208004	0.131541	0.0365542	0.254004
cg23571857	BIRC4BP	0.587479	0.146066	0.333566	0.0884862	0.253913
cg01031400	TNFRSF10D	0.301229	0.165716	0.0475091	0.020861	0.25372
cg25014318	GLP1R	0.318085	0.21825	0.06449	0.0340543	0.253595
cg09697795	SCRL	0.44828	0.16076	0.194861	0.0863302	0.253419
cg09499849	ACVR1	0.424577	0.133867	0.171385	0.049977	0.253192
cg19433435	FEZ1	0.560622	0.122608	0.30767	0.0364843	0.252952
cg00899659	ZNF22	0.495053	0.114971	0.242213	0.0482028	0.25284
cg25511429	NRN1	0.418636	0.178191	0.165869	0.0578175	0.252768
cg12024292	ASTN2	0.305893	0.15274	0.0532219	0.0136777	0.252672
cg21815667	HOXD8	0.327408	0.154916	0.0749671	0.0299491	0.252441
cg17923358	RELN	0.32863	0.180553	0.0763375	0.0137838	0.252292
cg08441806	NKX6-2	0.513004	0.133053	0.261014	0.0730915	0.25199
cg14696396	TM6SF1	0.3132	0.221899	0.0612629	0.0407962	0.251937
cg26937500	CARD11	0.350212	0.176636	0.0982922	0.0177385	0.25192
cg22462235	LEFTY2	0.591509	0.131419	0.33972	0.0668613	0.251789
cg01580681	HAND2	0.455243	0.171914	0.203489	0.0342526	0.251754
cg27182761	PHLDA1	0.43971	0.163312	0.18806	0.0562222	0.25165
cg09068528	ACADL	0.327944	0.250626	0.0763337	0.0272465	0.251611
cg18771300	RHOJ	0.474584	0.177678	0.22302	0.0571735	0.251563
cg03506489	KCNA4	0.300516	0.179285	0.049002	0.00832507	0.251514
cg20163033	C4orf8	0.733525	0.0707688	0.482486	0.0702119	0.251038
cg13652336	DEPDC2	0.319918	0.190887	0.0688947	0.0141503	0.251024
cg01546563	GATA4	0.356904	0.184097	0.10597	0.0242328	0.250934
cg21376883	ACTN2	0.380573	0.164461	0.12978	0.0219166	0.250793
cg20516209	EMILIN1	0.716467	0.103516	0.465735	0.0400297	0.250732
cg09911755	OSBPL7	0.480378	0.124849	0.229748	0.036602	0.25063
cg01664666	PLD5	0.297558	0.194841	0.0470585	0.00670102	0.2505
cg22289837	CA3	0.470719	0.132033	0.220295	0.032321	0.250424
cg26976437	LY6K	0.591608	0.173439	0.341375	0.0676576	0.250233
cg15271616	RUSC2	0.365209	0.236007	0.115599	0.0388839	0.24961
cg22449114	TCF15	0.365873	0.189329	0.116351	0.0285449	0.249522
cg01402255	GATAD2B	0.488329	0.118386	0.23887	0.0439682	0.249459
cg00891541	SMPD3	0.620213	0.157183	0.37108	0.0389525	0.249134
cg04528819	KLF14	0.353378	0.236561	0.104349	0.0364603	0.249029
cg20890210	KCNB2	0.322823	0.185865	0.0738452	0.00935298	0.248977
cg00848728	DAB1	0.263079	0.200834	0.0142339	0.0043904	0.248845
cg06539804	CPXM	0.306107	0.176297	0.0573214	0.00905311	0.248785
cg26607785	TBX21	0.400723	0.179238	0.152033	0.0306499	0.24869
cg22619018	CSMD1	0.30648	0.25784	0.0579263	0.0184133	0.248554
cg26777475	PCOLCE	0.726552	0.116214	0.478099	0.045843	0.248453
cg21591742	HOXD10	0.447368	0.147185	0.198957	0.0721691	0.248411
cg01366419	WBSCR17	0.348151	0.177825	0.100072	0.0557086	0.248079
cg07241568	ABO	0.289908	0.17532	0.042004	0.00696371	0.247904
cg06621358	CELSR3	0.391008	0.161552	0.143138	0.0221932	0.24787
cg12457773	VMP	0.348979	0.144995	0.101163	0.0218894	0.247815
cg01424107	CDX2	0.277005	0.201018	0.0294877	0.0088392	0.247518
cg15982419	RALBP1	0.367499	0.186835	0.120245	0.0273955	0.247253
cg01192900	BTG4	0.366863	0.24595	0.119829	0.03025	0.247034
cg16632715	HOXD11	0.375152	0.155678	0.128179	0.0414442	0.246973
cg19343464	GRIA4	0.290729	0.186444	0.0439876	0.00968596	0.246741
cg07425555	FLJ23447	0.415608	0.171424	0.168891	0.0281294	0.246717
cg12614105	NPY	0.338013	0.161475	0.0913912	0.0278711	0.246622
cg00516481	PDE9A	0.495298	0.145533	0.248867	0.0772642	0.246431
cg26721264	GALR1	0.301927	0.210519	0.0555882	0.0165117	0.246339
cg04622802	LOC387758	0.396113	0.176096	0.150058	0.0794574	0.246056
cg07536847	PAX7	0.424653	0.151403	0.178671	0.0535619	0.245982
cg04981492	SYDE1	0.440379	0.180486	0.194543	0.056656	0.245837
cg15457899	SCN3B	0.268192	0.210638	0.0223631	0.00557369	0.245829
cg00616135	LACTB	0.535281	0.139444	0.289762	0.0434216	0.245519
cg04273431	PRR3	0.537646	0.158993	0.292561	0.0440024	0.245086
cg03724463	CCK	0.359556	0.148211	0.114574	0.0239026	0.244981
cg15501381	NGB	0.621271	0.156038	0.376355	0.0555523	0.244916
cg10201668	NIP	0.318822	0.18847	0.0742946	0.0129302	0.244528
cg07644368	CDO1	0.502014	0.141575	0.257514	0.0464567	0.2445
cg04106785	CDK5R1	0.628433	0.144256	0.383943	0.0498781	0.24449
cg15403517	SRD5A2	0.471926	0.181579	0.227605	0.0631935	0.244321
cg10762615	FBXW10	0.578442	0.136319	0.334249	0.0501137	0.244193
cg19355190	EGR2	0.339657	0.193168	0.0955485	0.0110986	0.244108
cg20950011	CIDEA	0.310768	0.152534	0.0667618	0.0187893	0.244007
cg19462352	PROCA1	0.299186	0.143199	0.0552319	0.0541173	0.243954
cg09582042	ITR	0.370805	0.182845	0.126908	0.0511765	0.243897
cg00174500	CMTM5	0.594653	0.131884	0.350818	0.0304843	0.243836
cg25300386	COL1A2	0.27745	0.20431	0.0338562	0.00771771	0.243594
cg09096031	C2orf11	0.502038	0.109017	0.258519	0.0384462	0.243519
cg19531130	ANGPTL5	0.364204	0.176781	0.121056	0.0220743	0.243148
cg27553955	KCNG3	0.495954	0.118948	0.253364	0.0524084	0.24259
cg21634602	APC	0.279518	0.244159	0.0370099	0.0109293	0.242508
cg07447922	EPHA10	0.310174	0.182761	0.0681038	0.0115643	0.24207
cg25033993	STX1B2	0.358998	0.153547	0.117093	0.0158564	0.241905
cg19965810	KCNH7	0.28207	0.203475	0.0401725	0.00703838	0.241898
cg09404633	LMOD1	0.395928	0.172996	0.154333	0.0415042	0.241595
cg25239996	CD40	0.324491	0.180906	0.0829202	0.0251203	0.241571
cg20645065	ALPL	0.288511	0.249918	0.0471838	0.0181925	0.241327
cg00830029	NRIP2	0.47949	0.17135	0.23883	0.06107	0.240661
cg08872742	CDH5	0.37493	0.16433	0.13431	0.0163009	0.24062
cg02077702	ISLR	0.577178	0.111583	0.336637	0.0495909	0.240541
cg10046892	PAQR6	0.439111	0.167951	0.198699	0.059704	0.240411
cg11398517	FAM112A	0.659484	0.146534	0.419074	0.0791713	0.240411
cg26557658	FAM43B	0.397771	0.154053	0.157493	0.0442996	0.240278
cg18902090	PCDHAC1	0.273047	0.212232	0.0328281	0.0113835	0.240219
cg16864658	CCK	0.359017	0.209761	0.119006	0.0234643	0.240011
cg21458907	CADPS	0.282611	0.192542	0.0426036	0.01016	0.240007
cg15439862	DSC3	0.34609	0.181899	0.106119	0.0277459	0.239971
cg06269753	MSC	0.317286	0.174748	0.0777872	0.00874133	0.239499
cg21529533	HLA-G	0.262646	0.204897	0.0232823	0.00657133	0.239363
cg05681757	FGD4	0.464173	0.119982	0.224868	0.0416909	0.239306
cg26984805	TACR2	0.782374	0.0970054	0.543163	0.0481171	0.239211
cg02994974	SPON1	0.275448	0.204748	0.0364059	0.0140617	0.239042
cg20786074	EFEMP1	0.525694	0.166246	0.28688	0.0575372	0.238814
cg08995424	ATP5G2	0.302577	0.167223	0.0638047	0.023799	0.238772
cg11653466	FLJ43582	0.420462	0.117738	0.181698	0.0399533	0.238764
cg09786257	PCSK1	0.548182	0.12966	0.309419	0.0538622	0.238762
cg23095584	GBX2	0.370595	0.137757	0.131842	0.0323594	0.238754
cg07957491	UCK1	0.397588	0.1492	0.158845	0.0256117	0.238743
cg17252960	ID4	0.335938	0.20709	0.0977674	0.0233101	0.238171
cg22670329	CXCL6	0.493025	0.124902	0.254893	0.0450274	0.238132
cg19404582	GRIN1	0.423462	0.135191	0.185362	0.0245827	0.2381
cg01705587	SV2A	0.274069	0.170108	0.0361452	0.00618002	0.237924
cg26220350	PLTP	0.275669	0.240443	0.0377978	0.0100362	0.237871
cg17982102	RAB31	0.333433	0.152267	0.0958721	0.0231852	0.237561
cg15604467	POU4F1	0.28581	0.171883	0.0483262	0.0175842	0.237483
cg12163132	TBX2	0.448709	0.139996	0.21123	0.0497158	0.237479
cg10730712	COL23A1	0.28306	0.231299	0.045699	0.00610039	0.237361
cg03732545	CNTN2	0.424855	0.159627	0.187591	0.0435233	0.237264
cg06417962	RNH1	0.710386	0.163331	0.473147	0.0711739	0.23724
cg14721213	FMO2	0.507329	0.137029	0.270472	0.0399622	0.236857
cg04369341	C20orf100	0.367772	0.186414	0.131192	0.0449842	0.23658
cg00795812	PDCD1	0.435079	0.167629	0.198533	0.0436592	0.236546
cg09208010	MMP14	0.334093	0.18745	0.0977422	0.0209464	0.236351
cg08023751	MERTK	0.807743	0.0779729	0.571415	0.0570088	0.236328
cg14614211	IRXL1	0.339478	0.176156	0.103463	0.0246861	0.236015
cg17272843	KCTD14	0.336492	0.166428	0.100637	0.0317181	0.235855
cg20311501	APC	0.300211	0.236105	0.0644889	0.0147788	0.235722
cg19664945	GPR75	0.593018	0.150787	0.357377	0.0585519	0.235641
cg11525285	CHX10	0.372241	0.20682	0.136658	0.029734	0.235583
cg04599297	GAD2	0.346684	0.169588	0.111135	0.0151168	0.235549
cg24250393	PRKCB1	0.377478	0.144695	0.141945	0.0422311	0.235533
cg18530324	KIAA0427	0.508813	0.161199	0.273597	0.0537747	0.235216
cg18239753	KHDRBS2	0.329211	0.210094	0.0941445	0.0156517	0.235066
cg10940418	SLC39A7	0.460974	0.178418	0.22591	0.025306	0.235064
cg18838701	TNNI3	0.357007	0.166759	0.121949	0.0193642	0.235058
cg24673765	HSPB6	0.482834	0.113114	0.247824	0.0764918	0.23501
cg16042149	NEFH	0.320133	0.174197	0.08515	0.0198083	0.234983
cg22463915	EEF1A2	0.733176	0.117524	0.498237	0.0634386	0.23494
cg15105987	SOX2	0.495264	0.086038	0.260521	0.0271691	0.234743
cg02727423	EML1	0.63019	0.165049	0.395508	0.0320001	0.234682
cg16636110	ZNF264	0.556702	0.150837	0.322089	0.0482113	0.234613
cg00911351	PCDHGB4	0.356335	0.138855	0.121736	0.0359156	0.234599
cg16196812	PRLHR	0.458826	0.116298	0.22423	0.0444996	0.234596
cg14289461	LAMA4	0.407622	0.124582	0.173088	0.0273255	0.234534
cg02860342	HCN4	0.471445	0.143856	0.237319	0.0366136	0.234126
cg21604803	CPT1C	0.29083	0.219365	0.056878	0.015919	0.233952
cg15020645	APC	0.273633	0.240667	0.0397526	0.00797929	0.23388
cg22980351	WDR40B	0.585598	0.147766	0.351761	0.0724037	0.233837
cg16530429	LIN28	0.318914	0.216771	0.085081	0.014839	0.233833
cg22979433	CKMT2	0.595383	0.109777	0.361691	0.0528027	0.233693
cg13152535	CLEC11A	0.410849	0.156402	0.177278	0.0458105	0.233571
cg12629325	PCDHAC1	0.307552	0.244415	0.0742227	0.0236761	0.233329
cg05698069	PDLIM2	0.359647	0.165899	0.126429	0.0455561	0.233218
cg19779211	KCNQ1	0.365442	0.186321	0.132331	0.0282673	0.233111
cg18638931	MOV10L1	0.628758	0.125571	0.395669	0.0840572	0.233089
cg21233722	DOCK2	0.548513	0.155026	0.315544	0.0663772	0.232969
cg02624705	DCC	0.304032	0.169665	0.071085	0.018398	0.232947
cg19614321	RASSF2	0.281425	0.190795	0.048491	0.0110309	0.232934
cg19668234	TSP50	0.632433	0.133882	0.399791	0.124769	0.232642
cg17371081	NELL1	0.294248	0.219353	0.061642	0.030551	0.232606
cg08614481	HTR1B	0.297237	0.1696	0.0647365	0.0139511	0.232501
cg03469054	KIAA1944	0.328304	0.169944	0.0959449	0.0267277	0.232359
cg16557944	GPX7	0.257863	0.268794	0.0256939	0.0043631	0.232169
cg21053529	CX36	0.336954	0.178169	0.104805	0.0152335	0.232149
cg04490714	SLC6A2	0.31626	0.211099	0.0841613	0.0198126	0.232099
cg25713185	SLC19A3	0.334302	0.182805	0.102372	0.0209012	0.23193
cg17886204	DKFZp434I1020	0.261796	0.213419	0.02998	0.00978973	0.231816
cg15379633	RAB36	0.390483	0.182901	0.158781	0.10243	0.231702
cg02512860	CLDN15	0.738854	0.124729	0.507614	0.0665237	0.23124
cg00679738	FAM89A	0.245068	0.294978	0.0138547	0.00143051	0.231214
cg09025324	SART2	0.313046	0.182041	0.0818728	0.0152391	0.231173
cg05056120	EBF	0.325746	0.151888	0.0945733	0.0236161	0.231172
cg13030582	MFAP4	0.467754	0.145661	0.236776	0.0290334	0.230977
cg13354523	CLEC1A	0.615099	0.137171	0.38415	0.0705057	0.230949
cg19751300	ST8SIA5	0.28891	0.175811	0.058396	0.014121	0.230514
cg10605520	HRH3	0.281047	0.216015	0.0509035	0.0117247	0.230143
cg10556064	SMPD3	0.63469	0.155081	0.404562	0.0376584	0.230128
cg10175795	TCERG1L	0.325023	0.150494	0.0948974	0.0211954	0.230125
cg22774472	COL5A2	0.389299	0.140529	0.159287	0.0429255	0.230012
cg17178336	IHH	0.299721	0.218893	0.0700588	0.0140909	0.229663
cg21530890	SOX8	0.278712	0.212488	0.0491819	0.0153699	0.22953
cg22680204	CRMP1	0.358777	0.171323	0.129314	0.0319056	0.229462
cg04747322	SNCAIP	0.32673	0.159484	0.0973112	0.0179156	0.229418
cg16158681	MT3	0.316957	0.17368	0.0878707	0.016826	0.229087
cg21601405	CD40	0.566853	0.136219	0.337831	0.07012	0.229022
cg26701826	MGC26963	0.632133	0.124914	0.403375	0.0489691	0.228758
cg00107187	FLJ42486	0.389094	0.15603	0.160686	0.0476524	0.228407
cg25917510	HOXC8	0.261003	0.278207	0.0327014	0.0077908	0.228302
cg02245378	FLJ32447	0.490184	0.146897	0.262174	0.0410999	0.22801
cg07657776	UBE3B	0.597231	0.0808549	0.369674	0.0421154	0.227557
cg25993718	CBLN4	0.360023	0.178293	0.132476	0.0503971	0.227547
cg00594952	RIMS3	0.7181	0.138612	0.490811	0.0552644	0.227288
cg17243643	RDH5	0.626541	0.137291	0.399275	0.0443782	0.227266
cg04595372	CRISP2	0.710754	0.124789	0.483524	0.0570279	0.22723
cg03811478	SOX14	0.429554	0.0981548	0.202347	0.0310534	0.227207
cg26385222	HCA112	0.366987	0.192697	0.139819	0.0484797	0.227168
cg21546671	HOXB4	0.299675	0.249332	0.0725542	0.0232421	0.227121
cg09936561	DRD5	0.364986	0.14564	0.137955	0.0421806	0.227031
cg23771603	MYO3A	0.301944	0.220083	0.0752347	0.026229	0.22671
cg00350296	CD248	0.413814	0.147451	0.187251	0.0270698	0.226563
cg21309147	STAC2	0.248689	0.252961	0.0221556	0.00602412	0.226533
cg22268231	SPIB	0.475961	0.184167	0.249456	0.0630629	0.226505
cg10114327	GPR103	0.354944	0.157036	0.128678	0.0253469	0.226266
cg17897879	TNFRSF8	0.246315	0.187915	0.0201041	0.00632282	0.226211
cg22012981	ACOX2	0.723801	0.158384	0.497686	0.0347743	0.226116
cg08823182	S100A5	0.620662	0.0873452	0.39458	0.0676547	0.226082
cg24920358	PPIE	0.464703	0.177394	0.238791	0.0558456	0.225911
cg18871276	FLJ46156	0.299106	0.193694	0.0733213	0.013042	0.225784
cg20802392	CTSK	0.620186	0.144581	0.394629	0.0695311	0.225557
cg20415809	ITGA4	0.321477	0.207163	0.0960053	0.0179227	0.225472
cg25047280	HOXA9	0.372684	0.163609	0.147256	0.058285	0.225427
cg07376535	ADCYAP1	0.273143	0.187	0.0478856	0.00956522	0.225257
cg23704362	C8orf46	0.629236	0.143472	0.403979	0.0642048	0.225257
cg12515638	SFRP4	0.284419	0.181841	0.0592558	0.0161198	0.225163
cg23303408	POU4F3	0.30155	0.15353	0.0764504	0.0253411	0.2251
cg12382902	CCND2	0.237702	0.207893	0.0127602	0.00238182	0.224942
cg17834752	KCNK9	0.260355	0.209182	0.0364197	0.0128232	0.223935
cg16184943	SUHW2	0.316123	0.178534	0.0923365	0.0191353	0.223787
cg10146929	HIST1H1A	0.370252	0.177374	0.146485	0.0149052	0.223767
cg13202751	SLC6A3	0.401787	0.150583	0.178113	0.050878	0.223674
cg16020904	SPATA20	0.673635	0.119758	0.45002	0.0504886	0.223615
cg03630088	CPXM2	0.538075	0.168092	0.314544	0.0740692	0.223531
cg26090652	C1QTNF5	0.272475	0.207311	0.0491647	0.0111277	0.22331
cg11638200	PRKCQ	0.272029	0.245269	0.0487493	0.00710975	0.22328
cg24719984	PPFIA2	0.312313	0.170401	0.0890947	0.0238704	0.223219
cg18630040	PLA2G7	0.259201	0.248174	0.0360412	0.00694884	0.22316
cg16832407	TRPM3	0.333822	0.142194	0.110772	0.0101745	0.22305
cg02489552	FLJ40365	0.394952	0.101631	0.171909	0.0255186	0.223043
cg00318573	CHRNA4	0.388377	0.17004	0.165535	0.0213268	0.222842
cg03301801	FNDC7	0.6998	0.0939511	0.477111	0.0329995	0.222689
cg24520070	C14orf48	0.761247	0.113713	0.538563	0.0400738	0.222684
cg20692569	FZD9	0.508007	0.134158	0.285614	0.0422424	0.222393
cg27009703	HOXA9	0.644884	0.167174	0.422642	0.0911194	0.222242
cg04920951	GSTP1	0.256595	0.262649	0.0344953	0.00942589	0.2221
cg26924825	LCAT	0.820998	0.0804969	0.599008	0.0511683	0.22199
cg10149836	RAB11FIP4	0.360752	0.140516	0.138964	0.0272693	0.221788
cg22334665	SLC22A16	0.270626	0.184859	0.0488883	0.0220246	0.221737
cg25563456	WT1	0.264792	0.216618	0.0431072	0.0068928	0.221684
cg08331313	SPARC	0.336731	0.140979	0.115225	0.0487541	0.221506
cg02805028	MGC18079	0.546994	0.133755	0.32549	0.0323428	0.221504
cg03143849	CDKN1C	0.517495	0.11979	0.296639	0.0436031	0.220856
cg09872233	ALOX15	0.264133	0.189399	0.043487	0.0117814	0.220646
cg25050026	MFSD1	0.292177	0.138703	0.0716648	0.0192811	0.220512
cg14011639	PCDHGB7	0.278168	0.152335	0.0577287	0.0109432	0.220439
cg15195412	CX3CL1	0.373158	0.139638	0.153072	0.0258074	0.220085
cg13102585	RPIP8	0.355229	0.158129	0.135348	0.0357339	0.219881
cg23113963	SCNN1B	0.352975	0.161072	0.133495	0.0248014	0.21948
cg07773116	GDF10	0.346541	0.169753	0.127121	0.030254	0.219421
cg04922810	CRHR2	0.285942	0.155691	0.066592	0.0185665	0.21935
cg04770504	DFNA5	0.252377	0.199639	0.0331242	0.00462142	0.219253
cg07937272	PARP12	0.525315	0.135117	0.306209	0.052327	0.219107
cg05675373	KCNC4	0.269256	0.191191	0.0502078	0.0169114	0.219048
cg14127659	C22orf23	0.602469	0.141571	0.384543	0.0525205	0.217925
cg14539231	EPSTI1	0.253246	0.22049	0.0355878	0.00758862	0.217658
cg13591701	FAM20A	0.329856	0.239942	0.112357	0.0317259	0.2175
cg02586730	EFEMP2	0.623527	0.0816776	0.406294	0.0430609	0.217233
cg22752533	SLC12A5	0.548324	0.127137	0.331242	0.0412786	0.217082
cg12845808	PCDH12	0.584743	0.133993	0.367765	0.0449513	0.216979
cg22234962	C1orf104	0.363888	0.15639	0.14704	0.0422304	0.216849
cg06911084	DLX5	0.323672	0.179608	0.107218	0.0147492	0.216454
cg10003443	FOXA2	0.459397	0.132877	0.243328	0.0437839	0.216068
cg16954341	SCGN	0.325265	0.182244	0.109265	0.0132796	0.216
cg17194182	EPO	0.271525	0.223897	0.0555665	0.0105862	0.215958
cg04396791	SHANK2	0.563936	0.126989	0.348233	0.0901056	0.215702
cg00903242	CHL1	0.371435	0.149849	0.155737	0.0302166	0.215697
cg06589885	HFE2	0.70808	0.152394	0.492454	0.0393081	0.215626
cg14209518	NNMT	0.483856	0.126773	0.268298	0.0652144	0.215559
cg03064067	SLC6A15	0.414056	0.163496	0.198545	0.029305	0.215511
cg04582938	UAP1L1	0.370496	0.130896	0.155168	0.0714606	0.215328
cg20300246	LHX3	0.307238	0.183459	0.0920166	0.0204573	0.215221
cg20131596	PAM	0.572653	0.11736	0.357458	0.0533229	0.215195
cg03700462	HOXA1	0.232182	0.20216	0.0173745	0.00612827	0.214807
cg16725130	MMP19	0.400518	0.145324	0.185712	0.0362753	0.214805
cg00347904	SCUBE3	0.344335	0.180511	0.129606	0.026496	0.214729
cg00509670	PAX9	0.565413	0.120527	0.350773	0.0554654	0.214639
cg16787600	SORCS3	0.281752	0.247563	0.0672441	0.0210347	0.214508
cg11822659	DOK5	0.291146	0.184056	0.0768233	0.0118145	0.214323
cg11375102	C16orf30	0.536904	0.151573	0.322647	0.0520066	0.214257
cg12758687	DRD2	0.368348	0.118024	0.154432	0.0314878	0.213917
cg15839448	SFRP1	0.284952	0.177923	0.0711299	0.0220901	0.213822
cg06615154	S100A3	0.721991	0.123759	0.508405	0.0516245	0.213586
cg08528984	PRDM16	0.238216	0.210017	0.0249193	0.0127534	0.213297
cg08961832	NALP6	0.421496	0.176319	0.208211	0.0370214	0.213285
cg27390220	RIS1	0.560986	0.163248	0.347761	0.0444444	0.213225
cg12489960	SGCB	0.658943	0.12146	0.445977	0.0506851	0.212966
cg15120942	PLCD1	0.448001	0.163	0.235042	0.0232345	0.212959
cg14882700	OTOP1	0.371863	0.123104	0.158986	0.0363656	0.212877
cg02367951	HIST1H2AK	0.384442	0.101109	0.171679	0.0320293	0.212762
cg13986130	PTGS2	0.28338	0.209713	0.0706835	0.0162451	0.212696
cg12422450	CHGA	0.28259	0.285295	0.0699478	0.0191818	0.212643
cg12388309	PAK7	0.25889	0.214564	0.0467167	0.0124348	0.212173
cg11634198	NEUROD2	0.39477	0.170065	0.182641	0.0225406	0.212129
cg12005098	SLC16A12	0.259615	0.225595	0.0476866	0.0134842	0.211928
cg07657236	KCNH8	0.28032	0.1684	0.0684141	0.0147934	0.211906
cg02763671	RANBP1	0.632601	0.135849	0.420718	0.0672161	0.211884
cg05654164	C1orf52	0.359889	0.157963	0.148391	0.0333257	0.211497
cg24332422	APC	0.257245	0.210854	0.0459409	0.00681576	0.211304
cg25620220	LOC221091	0.746307	0.0805146	0.535041	0.0639816	0.211265
cg17214107	FGF2	0.361037	0.108657	0.149953	0.0304365	0.211084
cg18511007	COL1A2	0.289916	0.174464	0.0788535	0.0197496	0.211063
cg27603796	CTTNBP2	0.288863	0.169162	0.0778618	0.010048	0.211001
cg04897683	NEUROG1	0.338432	0.171486	0.127521	0.025594	0.210911
cg21264055	PRR3	0.263731	0.20534	0.0530813	0.0227346	0.210649
cg12841020	PGF	0.325818	0.168218	0.11533	0.0229751	0.210488
cg22879515	BTG4	0.247797	0.254866	0.0375494	0.020041	0.210248
cg14681055	PITX3	0.251888	0.235645	0.0418268	0.0165097	0.210061
cg24645221	PENK	0.271287	0.169664	0.0613744	0.0170628	0.209912
cg04375036	PPP1CC	0.730036	0.103188	0.520398	0.0491683	0.209638
cg05368341	SYT6	0.245088	0.178858	0.0354667	0.0101941	0.209621
cg03665785	HS747E2A	0.420198	0.104963	0.210832	0.0427529	0.209367
cg19014419	ZNF300	0.318558	0.139827	0.10923	0.028902	0.209328
cg12300353	KCTD8	0.238823	0.236987	0.0297062	0.0123691	0.209117
cg00840403	CHST4	0.323542	0.125735	0.114476	0.0417386	0.209066
cg12128839	HOXA5	0.311435	0.159156	0.102482	0.0160974	0.208954
cg13877915	ZNF132	0.251201	0.214313	0.0423291	0.0146514	0.208872
cg02774439	HAND2	0.287142	0.179079	0.0783512	0.0164828	0.208791
cg24939733	FLJ38159	0.57158	0.107067	0.362805	0.0488421	0.208774
cg06697251	TUBB4	0.472273	0.122931	0.263684	0.0334984	0.208589
cg26053864	ACTC	0.2707	0.19977	0.0621743	0.0123501	0.208526
cg06015218	GRM1	0.279975	0.167241	0.0714521	0.0107103	0.208523
cg06498267	HCN1	0.276642	0.177412	0.0681367	0.0158614	0.208506
cg06714705	OLFML1	0.756421	0.100362	0.548047	0.0847877	0.208374
cg20498685	TWIST1	0.265366	0.182734	0.0569968	0.0071669	0.20837
cg14262937	OPRM1	0.283171	0.182038	0.0748788	0.0267951	0.208292
cg03388193	HPSE2	0.315372	0.148284	0.107216	0.0192074	0.208156
cg00983520	CPT1B	0.425696	0.135452	0.21758	0.0521737	0.208116
cg00573606	COL6A3	0.622617	0.145436	0.414513	0.0614155	0.208104
cg12854483	CNN1	0.323111	0.13845	0.115111	0.0176061	0.208
cg04941721	EREG	0.232586	0.259901	0.0247115	0.00283826	0.207875
cg04999691	C7orf29	0.673985	0.13144	0.466153	0.0547493	0.207832
cg05628549	PRKCDBP	0.258033	0.164942	0.0504323	0.0114283	0.207601
cg08045570	FOXF2	0.245271	0.214505	0.037695	0.0137878	0.207576
cg05380982	KCNJ6	0.301532	0.171202	0.0940085	0.0153966	0.207524
cg14998713	ETS1	0.246447	0.175212	0.039214	0.0131667	0.207233
cg16714091	ADAMTSL1	0.33436	0.175108	0.127518	0.0218725	0.206842
cg27351358	BDNF	0.353745	0.127844	0.146955	0.0389615	0.20679
cg23841186	SOAT2	0.637994	0.128234	0.431445	0.0785036	0.206549
cg22134325	NPAS4	0.531995	0.153145	0.325498	0.0751085	0.206497
cg12622986	BARHL1	0.267187	0.176338	0.0607242	0.0153516	0.206463
cg03425110	NEUROG3	0.244087	0.172001	0.0377877	0.00805714	0.206299
cg18267381	ZNF659	0.32808	0.167981	0.121987	0.0321767	0.206093
cg04784672	LRFN5	0.23919	0.228781	0.0331749	0.00523126	0.206015
cg19797376	TAL1	0.480507	0.131499	0.274705	0.068818	0.205802
cg10709021	WRN	0.319494	0.195021	0.113697	0.0288642	0.205797
cg23651356	RGS17	0.541643	0.137599	0.335947	0.0395502	0.205696
cg20387341	FGF10	0.280676	0.193233	0.0751225	0.0129436	0.205554
cg16994506	CCND2	0.230873	0.198971	0.025486	0.00394702	0.205387
cg05899618	GDF7	0.248773	0.187577	0.0434151	0.00528826	0.205358
cg22341104	GFI1	0.286254	0.20502	0.0811819	0.0167611	0.205072
cg00666746	SYDE1	0.266218	0.140206	0.0611628	0.0130604	0.205055
cg11200929	CRABP1	0.265484	0.201582	0.06069	0.0168658	0.204794
cg26556719	PCDHA13	0.373014	0.147753	0.168306	0.0556774	0.204707
cg15802898	FOXE1	0.266266	0.210261	0.0617563	0.0186372	0.204509
cg13302823	SCRT1	0.443281	0.14132	0.238809	0.0238425	0.204472
cg13348944	SCN2B	0.405218	0.112067	0.201134	0.0318722	0.204084
cg19135761	WDR8	0.473546	0.145723	0.269968	0.0480337	0.203578
cg10946435	KCNN3	0.27112	0.176446	0.0676689	0.010735	0.203451
cg25186143	FAM57A	0.271963	0.192532	0.068603	0.0240641	0.20336
cg02916816	JPH4	0.301747	0.175842	0.098432	0.0294556	0.203315
cg21301440	CYGB	0.515435	0.149827	0.312156	0.0583887	0.203279
cg11136562	CENTD3	0.626936	0.107537	0.42373	0.0396971	0.203206
cg19591881	CD34	0.259904	0.194955	0.0570027	0.0111979	0.202901
cg02797569	PCOLCE	0.717741	0.0870827	0.514987	0.03848	0.202754
cg20008332	SOX11	0.256509	0.182915	0.0537732	0.0188118	0.202736
cg17020834	GRIA1	0.221316	0.221849	0.0188312	0.00432738	0.202485
cg12537796	NA	0.577104	0.126553	0.374672	0.0507391	0.202431
cg12874092	VIM	0.217912	0.248229	0.015503	0.00432921	0.202408
cg06200697	CTNND1	0.29499	0.168131	0.0927301	0.013592	0.202259
cg04564030	CDH7	0.305195	0.173058	0.103044	0.0128368	0.202151
cg21621248	LRRTM1	0.267847	0.15471	0.0661573	0.0139631	0.201689
cg00399483	DCC	0.301031	0.161518	0.0997843	0.0173895	0.201247
cg13121699	C2orf10	0.309215	0.16334	0.107993	0.0597347	0.201223
cg21922731	HSD17B6	0.300044	0.129984	0.0989072	0.0195891	0.201136
cg12763546	ZNF232	0.666296	0.111402	0.465196	0.0448693	0.2011
cg19576304	RAX	0.299632	0.153221	0.0987776	0.0248316	0.200854
cg22625415	ITGA1	0.275143	0.17849	0.0743915	0.0150556	0.200752
cg07080358	C2orf32	0.259981	0.227887	0.0593265	0.0262175	0.200655
cg01231779	NID2	0.229404	0.233762	0.028857	0.0062369	0.200547
cg19831077	LOC349136	0.447503	0.136538	0.247154	0.0464639	0.200349
cg14813083	LDHAL6A	0.709779	0.10268	0.50955	0.0722533	0.200229
cg21838334	NES	0.27144	0.203639	0.0712186	0.0223271	0.200221
cg07028533	CNTNAP2	0.26145	0.178531	0.0618104	0.0162762	0.199639
cg20339650	IGF2	0.309038	0.160092	0.109712	0.0222333	0.199326
cg04446579	ANKRD45	0.297895	0.145227	0.0987288	0.0139292	0.199166
cg01899253	FLT1	0.456876	0.142279	0.257772	0.0371319	0.199104
cg20329958	CRH	0.335889	0.117155	0.136786	0.0404775	0.199104
cg20357628	PHACTR3	0.293919	0.198764	0.0949152	0.0415189	0.199004
cg11177404	CGB2	0.462648	0.153494	0.263652	0.0494566	0.198996
cg26195812	DPYSL5	0.268263	0.208202	0.0692782	0.0272012	0.198984
cg06352750	SDPR	0.277937	0.165133	0.0793162	0.0115802	0.198621
cg23473904	COL6A2	0.248731	0.190355	0.0501407	0.0097608	0.19859
cg16902509	ITGA8	0.36361	0.158922	0.165096	0.0512793	0.198514
cg02170525	CD8A	0.320949	0.149068	0.122462	0.0285053	0.198487
cg04376312	MYLK	0.593425	0.141748	0.395098	0.0356419	0.198327
cg11418559	ZNF593	0.448135	0.150917	0.250092	0.0413595	0.198043
cg17192247	MAPRE3	0.492649	0.127084	0.294623	0.0489379	0.198026
cg26215428	PKD2	0.784213	0.063042	0.586266	0.0222777	0.197947
cg05508084	ZNF667	0.280605	0.163571	0.0827992	0.021698	0.197806
cg24447890	LMAN1L	0.722964	0.135357	0.525212	0.0759647	0.197752
cg15517609	RYR1	0.318705	0.168023	0.121089	0.0283111	0.197616
cg09945801	WRN	0.440063	0.137025	0.242474	0.0452353	0.197589
cg02335804	TCF2	0.292911	0.18713	0.0953635	0.0262222	0.197548
cg09636671	LMOD1	0.219087	0.208909	0.0215716	0.00437905	0.197515
cg24888049	FES	0.659135	0.125115	0.461821	0.0948523	0.197315
cg03860890	EGFR	0.241532	0.181059	0.0442676	0.0105897	0.197265
cg26299767	REM1	0.261914	0.193992	0.0647704	0.0123402	0.197143
cg05250458	ZNF177	0.425088	0.148639	0.228013	0.0634872	0.197075
cg13210534	HSPB2	0.398086	0.0842511	0.20128	0.0368758	0.196806
cg15852891	OTP	0.262493	0.152563	0.0657121	0.011044	0.196781
cg12438037	C9orf116	0.454127	0.143255	0.257429	0.0572037	0.196697
cg11105610	LGALS3BP	0.598632	0.146861	0.402044	0.0402097	0.196587
cg14221171	TAC1	0.291395	0.177583	0.0948174	0.0238008	0.196578
cg16028753	PODN	0.372611	0.126498	0.176232	0.0503799	0.196379
cg05022306	HOXC8	0.232209	0.242341	0.035908	0.00743731	0.196301
cg26252167	GPR6	0.261781	0.161144	0.0655734	0.0176024	0.196208
cg26525091	MADCAM1	0.33682	0.147001	0.140695	0.0244032	0.196125
cg18938204	EMILIN3	0.28135	0.168892	0.0854637	0.0262755	0.195886
cg25583174	FGF2	0.242633	0.226819	0.0471083	0.00851723	0.195525
cg04597449	GPR150	0.439487	0.145885	0.243967	0.059082	0.195519
cg05976074	SLC7A10	0.434346	0.168002	0.239029	0.0275469	0.195317
cg20804101	SLC6A13	0.490492	0.13716	0.295266	0.0484429	0.195226
cg02058918	GABBR2	0.276045	0.224741	0.0808433	0.0312883	0.195202
cg09030119	ZNF285	0.29548	0.140744	0.100293	0.0150045	0.195187
cg25724441	KCNJ2	0.230999	0.167523	0.0358292	0.00463877	0.19517
cg26896762	ISL1	0.296961	0.1482	0.10213	0.0418478	0.19483
cg02989257	COL16A1	0.747052	0.0886232	0.552223	0.0396646	0.194829
cg23239396	CALCR	0.277783	0.17125	0.0830899	0.0102047	0.194693
cg03561565	KCNS2	0.445235	0.13474	0.25068	0.0388808	0.194555
cg15774283	PTGS2	0.240096	0.182061	0.04559	0.0112735	0.194506
cg00015770	GPR103	0.291893	0.182195	0.0974108	0.0156357	0.194482
cg14396117	MYR8	0.481743	0.141562	0.287638	0.0705558	0.194105
cg00333528	GABRR1	0.365582	0.153616	0.171506	0.0509122	0.194076
cg24110050	TCTEX1D1	0.420377	0.155286	0.226848	0.0403451	0.193529
cg12120741	EDNRB	0.517454	0.143881	0.324151	0.0397835	0.193303
cg07038400	PPP2R3A	0.318859	0.142506	0.125625	0.0147602	0.193234
cg22156632	WNT6	0.304865	0.136796	0.111879	0.0175831	0.192987
cg10217445	OLIG2	0.31359	0.170899	0.120657	0.0283162	0.192933
cg10743104	PDPN	0.237756	0.198462	0.0448788	0.00914711	0.192877
cg01049530	BMP3	0.243978	0.250487	0.051164	0.0103576	0.192814
cg01484156	NCALD	0.580895	0.141554	0.388165	0.066765	0.192729
cg23129478	ST8SIA5	0.255377	0.169903	0.0627663	0.0162873	0.192611
cg01344171	C6orf206	0.669858	0.126159	0.477263	0.037576	0.192595
cg17233601	PTPN5	0.725448	0.12545	0.532943	0.0573471	0.192505
cg24794531	TRPC1	0.246119	0.196999	0.0539631	0.0102748	0.192156
cg15786837	HOXB13	0.25306	0.170677	0.0610512	0.00924838	0.192009
cg12406559	ZNF532	0.322235	0.178704	0.130502	0.0318642	0.191734
cg13991233	GAS7	0.283358	0.143743	0.0917481	0.0226907	0.191609
cg09963123	KLF3	0.327049	0.149322	0.135558	0.0388069	0.19149
cg12788467	TCF2	0.43602	0.157605	0.24464	0.0339924	0.19138
cg16607065	TP73	0.619802	0.143565	0.42864	0.0539551	0.191163
cg00615241	PRTN3	0.457041	0.140359	0.266013	0.0514658	0.191028
cg18110483	THBS4	0.25121	0.148649	0.0602369	0.00957817	0.190973
cg06493386	TRPA1	0.272307	0.171094	0.0813856	0.023852	0.190922
cg01078276	PLAU	0.227921	0.185754	0.0370807	0.00849777	0.19084
cg10281478	DYNC1I1	0.408269	0.162142	0.217509	0.037126	0.19076
cg17966619	NT5E	0.242152	0.244535	0.0514777	0.0179823	0.190674
cg15980408	TMEM22	0.217495	0.203331	0.0268555	0.00824595	0.19064
cg13097407	CRIP3	0.270181	0.186733	0.079551	0.0208382	0.19063
cg04856858	CENTG2	0.25888	0.164857	0.0684854	0.035725	0.190394
cg19402885	PTPRO	0.246991	0.174279	0.0567629	0.00812718	0.190228
cg26203861	TMEM58	0.54141	0.127624	0.351273	0.0403248	0.190136
cg13765785	SCN3B	0.288693	0.175598	0.098582	0.0151443	0.190111
cg22303211	SOX1	0.480423	0.0837591	0.290371	0.0308806	0.190052
cg19423196	MAT1A	0.355388	0.14853	0.165471	0.0285859	0.189917
cg15183083	KCNA4	0.276425	0.175647	0.0866782	0.01918	0.189746
cg07965823	THSD3	0.234481	0.233073	0.044844	0.0117102	0.189637
cg00294382	IL23A	0.406978	0.129906	0.217454	0.0444573	0.189524
cg08532057	NUPL1	0.275117	0.132639	0.0857675	0.0240387	0.189349
cg02126753	AEBP1	0.294527	0.196536	0.105229	0.0164622	0.189298
cg08056146	SOX7	0.224182	0.230897	0.034973	0.00634438	0.189209
cg03662459	IL11RA	0.690697	0.0713357	0.501555	0.0341566	0.189142
cg25766774	ZDHHC3	0.439622	0.107455	0.250537	0.0455096	0.189085
cg25375764	ALDH5A1	0.42934	0.131737	0.240326	0.0470334	0.189014
cg24576425	GALNT5	0.324188	0.125225	0.13519	0.0222301	0.188998
cg27059238	HIST1H2BI	0.33116	0.0937362	0.142175	0.0257265	0.188985
cg14686321	FLJ31951	0.242846	0.165331	0.0539724	0.0309934	0.188874
cg23242898	DCC	0.303718	0.13586	0.114874	0.0247519	0.188844
cg03100752	ASNA1	0.666872	0.159885	0.478057	0.0255748	0.188815
cg08918749	LPL	0.26813	0.188059	0.0794048	0.0206922	0.188725
cg04435420	SGCD	0.247545	0.169305	0.0588353	0.0218192	0.18871
cg20938359	SLC6A12	0.313874	0.132329	0.125253	0.0276111	0.188621
cg21448423	ACOT11	0.496572	0.0935253	0.308166	0.0652945	0.188406
cg18592174	CHAT	0.24062	0.153023	0.0522543	0.00932499	0.188366
cg00739120	NIFIE14	0.356731	0.147515	0.168668	0.0144111	0.188063
cg21842478	HOXB13	0.234163	0.187586	0.0461242	0.00680112	0.188039
cg22037648	SEMA3B	0.214215	0.237796	0.0263843	0.00544924	0.187831
cg18382305	C18orf34	0.507952	0.105296	0.320138	0.0337744	0.187814
cg14611174	SIX6	0.249784	0.176854	0.0620542	0.0120998	0.187729
cg19461621	COLEC12	0.275402	0.180183	0.0878483	0.0173945	0.187553
cg00888007	CCND2	0.227921	0.207878	0.0404192	0.00720242	0.187502
cg08762247	TMEM100	0.332072	0.134525	0.144814	0.0315177	0.187258
cg08640498	INHBC	0.411249	0.133588	0.22409	0.0385046	0.187158
cg21142272	LOC283849	0.602452	0.123149	0.415425	0.0590231	0.187027
cg25971347	FOXF1	0.227909	0.189046	0.0411175	0.0107212	0.186792
cg11619390	ZBTB8	0.331874	0.16179	0.145152	0.0219668	0.186722
cg22029275	FLJ25477	0.295015	0.195009	0.10831	0.0320909	0.186704
cg17177699	COL5A3	0.429259	0.104288	0.24263	0.0292303	0.186628
cg25913233	SPARC	0.282864	0.159737	0.0962667	0.0434139	0.186597
cg12998491	FAM78A	0.203387	0.222195	0.0169715	0.00513027	0.186415
cg24805239	DFNA5	0.205864	0.213454	0.0195965	0.00408544	0.186267
cg17412258	DLK1	0.247764	0.161906	0.0615308	0.0140561	0.186234
cg26590537	KCNA1	0.221804	0.178065	0.0356076	0.0082163	0.186197
cg04270799	KIF5A	0.304199	0.166421	0.118044	0.0189481	0.186155
cg16831889	HDC	0.555701	0.0914395	0.369651	0.0468396	0.18605
cg22775000	TMEFF1	0.220468	0.213999	0.034735	0.00386012	0.185733
cg24480859	SLC2A5	0.274546	0.148563	0.0888819	0.027394	0.185664
cg11208483	SOX21	0.433771	0.0772242	0.248115	0.0358144	0.185656
cg17105014	GYPC	0.262241	0.102485	0.0766161	0.0189773	0.185625
cg10186456	MGC52282	0.815037	0.101723	0.629452	0.0938639	0.185585
cg13351161	SCARA3	0.337754	0.176993	0.152175	0.0327961	0.185578
cg21762589	BNIP3	0.503417	0.127287	0.317917	0.0383722	0.1855
cg05500015	NAALAD2	0.24315	0.154675	0.0576905	0.0129048	0.185459
cg09220361	GABRG2	0.289091	0.1497	0.103862	0.0215697	0.185229
cg19042062	KCNJ2	0.262624	0.143956	0.0774596	0.017455	0.185165
cg01643580	KCNK3	0.34086	0.174842	0.155914	0.0244919	0.184946
cg00839584	IL1A	0.485807	0.114668	0.301046	0.0448552	0.184761
cg01839464	DCC	0.269485	0.18151	0.0847959	0.0222503	0.18469
cg22040627	SLC13A5	0.230385	0.146014	0.0457008	0.0135151	0.184685
cg01610488	TRPA1	0.226801	0.213128	0.0421921	0.0131605	0.184609
cg07570142	MOXD1	0.239051	0.211631	0.0546279	0.00649782	0.184423
cg15125472	HSPB6	0.403809	0.125799	0.219517	0.0643019	0.184291
cg06290096	PHLDB1	0.621548	0.0753754	0.437326	0.0366523	0.184221
cg24317255	RGS17	0.231663	0.19533	0.0475157	0.007961	0.184147
cg01920829	CDK5R2	0.323445	0.1691	0.139394	0.0138364	0.18405
cg10282491	CLDN9	0.530365	0.133131	0.346395	0.0692561	0.18397
cg27011193	LOC654342	0.427578	0.0721304	0.244003	0.0390673	0.183575
cg19630689	SERPINA12	0.274028	0.170044	0.0906692	0.029599	0.183359
cg03667047	KL	0.49395	0.134076	0.310628	0.0571412	0.183322
cg09874752	SFRP5	0.218435	0.202555	0.0351485	0.00901064	0.183287
cg00557354	ARHGEF7	0.207692	0.232618	0.0245844	0.00778306	0.183107
cg07070934	GJA4	0.230077	0.196077	0.0469726	0.00741375	0.183104
cg20256494	CABP7	0.263007	0.197276	0.0800438	0.0169412	0.182964
cg20239740	SYT5	0.222822	0.182609	0.0398784	0.00705057	0.182944
cg26884581	PYGM	0.339779	0.135766	0.156929	0.0471092	0.18285
cg10298815	GPR88	0.230066	0.176291	0.0473758	0.0202828	0.18269
cg21688264	SNAP91	0.222945	0.192367	0.0403564	0.0163578	0.182589
cg27320127	KCNK12	0.237231	0.17164	0.0547053	0.0107742	0.182525
cg02620769	CCDC65	0.215563	0.201917	0.0331043	0.00965709	0.182458
cg25905812	DMRT1	0.215299	0.17016	0.0328965	0.00541832	0.182403
cg23026995	XPNPEP2	0.447547	0.124409	0.265432	0.0360065	0.182115
cg04086834	SMAP1	0.688165	0.10381	0.506133	0.0373532	0.182032
cg21667836	PRMT8	0.336188	0.151294	0.154471	0.0330003	0.181717
cg13059782	CNTNAP3	0.274182	0.133727	0.0927379	0.0139434	0.181444
cg03316864	B3GNT3	0.281706	0.148216	0.100307	0.0142681	0.1814
cg16848873	HOXB6	0.394285	0.145135	0.213088	0.0317499	0.181197
cg10938486	FLJ20581	0.393543	0.123595	0.212348	0.0470986	0.181195
cg25288155	PLEKHB1	0.638162	0.0914299	0.456976	0.0460642	0.181186
cg27634151	GPR83	0.235576	0.143015	0.0544813	0.0169304	0.181094
cg19352038	PAX3	0.531571	0.133883	0.350518	0.0804326	0.181053
cg15701111	KRTHB1	0.749641	0.0823749	0.568663	0.0684192	0.180979
cg27154163	KIT	0.207071	0.180878	0.0261406	0.00379759	0.180931
cg10249734	SECTM1	0.445597	0.138818	0.26473	0.0368476	0.180866
cg17749456	HSPBP1	0.311155	0.122415	0.130381	0.0200184	0.180773
cg27299588	PTPRS	0.534628	0.127589	0.353878	0.036679	0.18075
cg10106284	FAM49A	0.422726	0.1393	0.242156	0.022517	0.18057
cg02836529	NEUROD1	0.267945	0.126687	0.0874838	0.0218656	0.180461
cg02501779	CBLN4	0.241709	0.133922	0.0612666	0.0163146	0.180442
cg19292008	FOXE1	0.23548	0.193435	0.0550563	0.0115321	0.180424
cg03317245	P2RX5	0.609919	0.112133	0.429532	0.0387967	0.180386
cg13755070	FLI1	0.258585	0.121724	0.07838	0.0187865	0.180205
cg22129364	GPX7	0.222998	0.185427	0.0428385	0.00836148	0.180159
cg11584690	ZNF574	0.591996	0.0943237	0.411868	0.0483204	0.180128
cg05260966	TIMP3	0.342285	0.131703	0.162211	0.0320378	0.180075
cg00208967	OLFM2	0.325585	0.146871	0.145576	0.0171143	0.180009
cg03278643	EVC2	0.607618	0.122272	0.427613	0.0538496	0.180005
cg17580045	CCND2	0.366398	0.144457	0.186483	0.037164	0.179915
cg18221862	TMEFF2	0.238424	0.167949	0.0586838	0.0141112	0.179741
cg06575572	C22orf8	0.360097	0.141667	0.180467	0.0412626	0.17963
cg07642638	CHGB	0.270983	0.162144	0.0913608	0.0216039	0.179622
cg04291079	MEG3	0.827087	0.0728806	0.64762	0.0286576	0.179467
cg05184394	FLJ38377	0.594781	0.117345	0.415488	0.0843066	0.179293
cg26256793	COL11A1	0.255464	0.142051	0.0762405	0.0149605	0.179224
cg27478659	KRT16	0.445329	0.107187	0.266134	0.0439382	0.179194
cg24800810	RGS7	0.248308	0.192725	0.0691292	0.00987106	0.179179
cg09606564	MFAP4	0.420449	0.133918	0.241343	0.0539492	0.179106
cg21057046	NBL1	0.293953	0.158825	0.115049	0.025116	0.178904
cg17749443	ZFP37	0.210514	0.231478	0.0316295	0.005222	0.178884
cg16014085	ZNF553	0.356457	0.14821	0.177576	0.0245965	0.178882
cg00386408	TGFBI	0.306245	0.153819	0.127457	0.0368844	0.178788
cg14601284	PLXDC1	0.277766	0.193115	0.0990831	0.0122314	0.178683
cg23663332	RBM13	0.579722	0.131308	0.401214	0.0477437	0.178508
cg18059088	HS3ST1	0.23168	0.221449	0.0532408	0.0108799	0.17844
cg17496921	TSPAN16	0.537695	0.139294	0.359377	0.0744973	0.178318
cg21053323	SUMO3	0.285046	0.170575	0.106783	0.0470098	0.178263
cg00806490	CDH13	0.265543	0.178745	0.0876663	0.0193444	0.177877
cg19257200	SOX10	0.743492	0.11402	0.565692	0.0484204	0.1778
cg04080057	CACNG6	0.481863	0.132782	0.304358	0.0417949	0.177505
cg14294758	LSAMP	0.271646	0.152406	0.0942505	0.0237322	0.177396
cg26626089	PRKCG	0.299336	0.136389	0.122297	0.0303052	0.177039
cg13297960	NCAM2	0.246373	0.159077	0.0694057	0.0120494	0.176968
cg14289511	FLJ45256	0.260614	0.15379	0.0837805	0.0185984	0.176833
cg06810647	CRAMP1L	0.308647	0.135908	0.131852	0.0282666	0.176795
cg09632136	NNMT	0.382322	0.0951421	0.205704	0.0284022	0.176619
cg05768141	KCNJ10	0.271336	0.175	0.0948041	0.0153614	0.176532
cg25631352	ADD2	0.360892	0.152668	0.184403	0.0327005	0.176489
cg02257405	ACSL6	0.443456	0.125672	0.267033	0.048525	0.176423
cg12251804	C10orf125	0.219554	0.21775	0.0433466	0.016026	0.176207
cg22705929	YPEL4	0.482101	0.0955814	0.305895	0.0408197	0.176206
cg24417499	HPCA	0.268571	0.149052	0.0926316	0.013601	0.175939
cg01443452	GAPDHS	0.768151	0.104878	0.592386	0.0880603	0.175766
cg07696033	ALX4	0.258461	0.13432	0.0828029	0.034881	0.175658
cg18356799	DSC1	0.58049	0.127702	0.404833	0.055012	0.175657
cg03003060	GPM6B	0.2259	0.153727	0.0503606	0.016072	0.175539
cg23181133	CEACAM3	0.628762	0.128584	0.453254	0.0514765	0.175508
cg11220060	KLF1	0.502991	0.111481	0.327566	0.0609508	0.175425
cg17183546	D4S234E	0.23169	0.143243	0.0565799	0.0174376	0.17511
cg11594228	RANBP1	0.558919	0.126162	0.383873	0.0461237	0.175046
cg18335068	ZNF677	0.225868	0.170486	0.0508309	0.0092242	0.175037
cg19176447	AKAP2	0.358984	0.154504	0.183952	0.0286941	0.175032
cg12995941	INSRR	0.254563	0.20773	0.0795371	0.0194152	0.175026
cg06537230	DLX5	0.345344	0.14124	0.170358	0.0165267	0.174986
cg13828047	MPI	0.410865	0.127049	0.235931	0.0524446	0.174934
cg03104936	GRB10	0.611432	0.144744	0.436598	0.0405462	0.174833
cg04780454	SERPINF2	0.428182	0.101718	0.253378	0.0391659	0.174804
cg23187653	PCSK1	0.227201	0.149881	0.0524166	0.0136697	0.174784
cg16257091	BDNF	0.261015	0.124492	0.0862943	0.018704	0.174721
cg18793806	ZNF514	0.397387	0.120804	0.222764	0.0325539	0.174623
cg14818279	SH3TC2	0.817643	0.0663757	0.643184	0.111642	0.17446
cg14409958	ENPP2	0.387708	0.105914	0.213332	0.0511535	0.174375
cg01775265	RP11-49G10.8	0.445982	0.111559	0.271735	0.0360102	0.174247
cg24507762	KCNB1	0.318887	0.13755	0.144797	0.0351104	0.174089
cg17795240	GATA4	0.350564	0.141007	0.176605	0.0363456	0.173959
cg18277754	ALK	0.220523	0.191347	0.0466057	0.0123231	0.173917
cg19438514	C20orf102	0.317085	0.1362	0.143386	0.0249209	0.1737
cg07546360	FLJ27365	0.378555	0.137785	0.204859	0.0315613	0.173696
cg15238200	TRIM65	0.835659	0.0723315	0.661974	0.0444909	0.173685
cg15984661	CCDC8	0.270103	0.155848	0.0967574	0.0328229	0.173346
cg00465284	LRRTM1	0.220867	0.193978	0.0476248	0.00890752	0.173243
cg22233974	MACF1	0.585633	0.100275	0.412392	0.0489228	0.173242
cg03846767	TP73	0.851528	0.128662	0.678513	0.0757063	0.173015
cg02510853	PKMYT1	0.559943	0.112623	0.387112	0.0510881	0.172831
cg04329382	FLJ27365	0.343054	0.154046	0.170386	0.022559	0.172668
cg15526708	TGFBR1	0.221136	0.162338	0.0485945	0.0110793	0.172542
cg01321151	AP2A2	0.506335	0.116271	0.333896	0.039717	0.17244
cg08997253	GRIN3A	0.219705	0.157736	0.047302	0.0128967	0.172403
cg11360718	TM9SF4	0.570698	0.136458	0.398391	0.0327418	0.172307
cg13449778	C1orf76	0.221305	0.193788	0.0492951	0.0153696	0.172009
cg24997944	KCNH8	0.20215	0.178559	0.0303296	0.00726908	0.171821
cg11516377	DPH1	0.222464	0.162722	0.0506912	0.0154787	0.171773
cg25725843	ST6GAL2	0.313653	0.124482	0.142181	0.0231828	0.171472
cg04987894	GSTM5	0.451846	0.138956	0.280422	0.0606851	0.171425
cg06914598	RBAK	0.45308	0.101222	0.281922	0.0281114	0.171158
cg18219418	PARP6	0.694136	0.0977928	0.523004	0.052689	0.171133
cg02569613	C10orf72	0.223084	0.195346	0.0521496	0.0122702	0.170935
cg23896545	NOMO1	0.336462	0.0944806	0.165667	0.0173523	0.170796
cg12288726	ARF5	0.674046	0.11709	0.503424	0.0708346	0.170623
cg01907837	RNF8	0.606471	0.132052	0.435965	0.0631853	0.170506
cg04418492	CYP7B1	0.193738	0.199694	0.0233033	0.00956673	0.170435
cg20269537	ATXN10	0.341673	0.112979	0.171353	0.0220485	0.17032
cg27132814	C20orf79	0.578152	0.155468	0.748166	0.0519245	-0.170013
cg17983307	DKFZp434B1231	0.683973	0.124793	0.854018	0.0184473	-0.170045
cg13626881	ADORA1	0.57613	0.148758	0.746178	0.0283258	-0.170048
cg04616963	XCL1	0.378027	0.113344	0.548151	0.0487648	-0.170123
cg10523494	CD300LB	0.391811	0.0871236	0.562174	0.0421358	-0.170362
cg25007250	NOS3	0.682409	0.14738	0.852884	0.0398087	-0.170475
cg20576002	FAM112B	0.658883	0.156331	0.830091	0.0212576	-0.171208
cg06236276	SLC22A2	0.559225	0.124285	0.7307	0.03419	-0.171475
cg18917378	BCAS1	0.353451	0.121837	0.525267	0.0495746	-0.171816
cg21784940	REPIN1	0.373673	0.097936	0.545554	0.0944514	-0.171881
cg13424229	CPA3	0.67013	0.135989	0.842234	0.0124228	-0.172105
cg07804582	MGC33367	0.642955	0.14996	0.815413	0.0359062	-0.172458
cg26767897	XDH	0.550222	0.134485	0.722805	0.0304213	-0.172582
cg25066857	GNLY	0.684929	0.143517	0.857717	0.0262499	-0.172789
cg24269657	F7	0.476377	0.130703	0.649227	0.0375623	-0.17285
cg19642007	TNNT3	0.707688	0.184189	0.880731	0.0209163	-0.173043
cg24926042	KRTHB2	0.671464	0.155487	0.845025	0.0265288	-0.173561
cg09813840	SELPLG	0.440914	0.133779	0.61464	0.0290148	-0.173727
cg09076077	FLJ33860	0.667256	0.162869	0.84107	0.0276879	-0.173814
cg12397274	TINAG	0.421689	0.116379	0.595704	0.0732888	-0.174016
cg25463779	FAM101A	0.43114	0.090894	0.605667	0.0284479	-0.174527
cg23507131	DARC	0.391662	0.131057	0.566737	0.0266624	-0.175076
cg08947964	CX62	0.509771	0.126118	0.684849	0.0527483	-0.175078
cg14116596	TBXAS1	0.555102	0.10845	0.730821	0.0218671	-0.175719
cg16158220	REGL	0.588617	0.145199	0.76445	0.0406325	-0.175833
cg07873488	MUC17	0.619347	0.157825	0.795226	0.05859	-0.175879
cg20678353	FLJ35695	0.481148	0.109254	0.657076	0.0533638	-0.175929
cg03802191	TARBP1	0.370305	0.112344	0.546542	0.0742281	-0.176237
cg23447996	SYK	0.274956	0.0862741	0.451233	0.0477162	-0.176277
cg02671171	RPH3AL	0.43791	0.12942	0.614917	0.0682658	-0.177008
cg10037005	CD37	0.475943	0.146084	0.653295	0.0311831	-0.177353
cg13259290	CSF2	0.675855	0.150174	0.853571	0.0529932	-0.177715
cg11828089	CALN1	0.765785	0.172832	0.94358	0.01333	-0.177795
cg18414381	EHF	0.294014	0.112975	0.471888	0.0675947	-0.177874
cg13758677	GAGE4	0.684734	0.135931	0.862891	0.0226587	-0.178158
cg18729973	TFF1	0.487944	0.118008	0.666824	0.034831	-0.17888
cg22181664	CLCA1	0.490184	0.141218	0.669236	0.0473059	-0.179051
cg12855851	PGC	0.561559	0.122736	0.741159	0.0462358	-0.1796
cg08886154	PAX4	0.412962	0.139514	0.592596	0.0369726	-0.179635
cg04915566	RUNX1	0.520759	0.112039	0.701016	0.0322441	-0.180257
cg10746737	HLA-DRB5	0.617366	0.154875	0.797643	0.0505622	-0.180277
cg24754277	DAPK1	0.472256	0.122175	0.652578	0.0675174	-0.180322
cg26738880	DPP6	0.429089	0.0996154	0.609647	0.0402293	-0.180559
cg20993403	EPB41L1	0.344595	0.119799	0.525165	0.0697272	-0.18057
cg09480837	PLCE1	0.712747	0.18087	0.89345	0.0136812	-0.180703
cg00514407	SERPINE2	0.222266	0.143001	0.403235	0.0607423	-0.180969
cg24443250	TNFSF8	0.483649	0.162213	0.665034	0.0282205	-0.181385
cg18490846	C17orf73	0.212099	0.122013	0.393806	0.0758187	-0.181707
cg10451565	GPR77	0.386977	0.09974	0.568809	0.0458095	-0.181831
cg24654350	KIR3DL1	0.512752	0.147635	0.694744	0.0247548	-0.181992
cg19464944	FCGR1A	0.360507	0.142783	0.543228	0.0715725	-0.18272
cg17709873	LTA	0.635492	0.121258	0.818379	0.0287359	-0.182887
cg15642035	C8ORFK32	0.531545	0.149675	0.714435	0.0581	-0.18289
cg01469547	OR5P3	0.670312	0.165106	0.8533	0.0201388	-0.182988
cg08390254	ATP1A2	0.591994	0.135398	0.776601	0.0311023	-0.184606
cg12867448	ODF2	0.615168	0.147547	0.799944	0.0264468	-0.184776
cg14547335	ATP2B2	0.744573	0.20894	0.929439	0.0164019	-0.184866
cg16612699	OR8B8	0.669783	0.161772	0.854967	0.0293455	-0.185183
cg24938727	GUP1	0.34019	0.117204	0.525655	0.0551709	-0.185466
cg11984608	CLDN16	0.676641	0.161423	0.862464	0.0128547	-0.185823
cg03544379	OR7C2	0.428323	0.141745	0.614171	0.0329841	-0.185849
cg14003512	PLGLB2	0.482561	0.142001	0.668724	0.0658637	-0.186164
cg11846968	PLUNC	0.509523	0.125684	0.696063	0.0349712	-0.18654
cg27285720	GBP4	0.405884	0.133543	0.593207	0.0529036	-0.187323
cg16543027	PLCB2	0.38575	0.112988	0.573105	0.0360428	-0.187355
cg20804821	GPR62	0.381877	0.13965	0.569256	0.0507285	-0.187379
cg16449972	ZNF423	0.676547	0.15812	0.864052	0.0342398	-0.187505
cg09230646	FLJ20718	0.650288	0.145249	0.83806	0.062892	-0.187772
cg09577651	SIRPB1	0.335101	0.136075	0.522906	0.0454489	-0.187805
cg05619712	CRYGC	0.49216	0.123055	0.680704	0.0861535	-0.188544
cg02415431	IGLL1	0.465762	0.12031	0.654394	0.033724	-0.188632
cg21902327	FGF6	0.536616	0.135512	0.725734	0.0434754	-0.189119
cg15928132	CCKAR	0.54788	0.143748	0.737126	0.0474141	-0.189246
cg11270633	IL28B	0.524049	0.120902	0.713322	0.0377579	-0.189273
cg25221254	ASAH3	0.525026	0.145846	0.714404	0.045303	-0.189379
cg00411097	MGC9712	0.355972	0.0927234	0.545957	0.0579398	-0.189985
cg14940420	IQCF2	0.487981	0.137847	0.678092	0.0524767	-0.190112
cg22335340	PTPN6	0.482929	0.140255	0.67319	0.0356252	-0.190261
cg25310567	GALNTL5	0.430308	0.103642	0.620782	0.0677895	-0.190474
cg03548857	FFAR2	0.309503	0.094083	0.499988	0.0557263	-0.190485
cg13689073	LARP1	0.434398	0.139581	0.625288	0.0485996	-0.19089
cg00955451	APBA2	0.591256	0.16221	0.782176	0.0380014	-0.19092
cg13126790	FLJ27255	0.676398	0.1645	0.867331	0.0262321	-0.190933
cg23458892	SIGLEC7	0.582938	0.156771	0.773953	0.0300167	-0.191015
cg19306866	KRTAP6-2	0.609082	0.16991	0.800303	0.0450635	-0.19122
cg04958389	PRSS2	0.559164	0.165213	0.751054	0.0332328	-0.19189
cg22266967	S100P	0.573723	0.159438	0.765877	0.0395457	-0.192154
cg20856834	OR12D3	0.408113	0.139037	0.600523	0.0364461	-0.19241
cg27626424	LOR	0.744924	0.208465	0.937554	0.0137543	-0.192629
cg16585619	KRT19	0.518742	0.105682	0.711478	0.0455234	-0.192737
cg21614638	DAPP1	0.307339	0.109217	0.50042	0.0302525	-0.193081
cg17605084	HEM1	0.499755	0.146031	0.693403	0.0178328	-0.193648
cg26989103	TRHR	0.449437	0.173693	0.643307	0.0389788	-0.19387
cg05810550	DEFB106A	0.566896	0.157936	0.760793	0.0466788	-0.193897
cg12491368	LOC196549	0.677533	0.15122	0.871494	0.0414092	-0.19396
cg02168291	CDH13	0.51959	0.16008	0.713633	0.022615	-0.194043
cg20312687	DEFB118	0.40562	0.124711	0.599888	0.068149	-0.194268
cg27641018	EPDR1	0.487209	0.145187	0.681769	0.0302769	-0.19456
cg18783781	MGC4399	0.640972	0.12292	0.835643	0.0157526	-0.19467
cg15037004	ZNF366	0.360765	0.105302	0.555541	0.0489349	-0.194776
cg09069593	GPR114	0.43293	0.141798	0.627791	0.0432102	-0.194861
cg21578207	C1orf164	0.442063	0.0961447	0.636947	0.030246	-0.194884
cg25853078	OPCML	0.449256	0.12581	0.644213	0.0501638	-0.194958
cg17687962	KLK3	0.545082	0.162655	0.740074	0.0319227	-0.194992
cg15075718	MFRP	0.646063	0.17658	0.841178	0.0212642	-0.195115
cg15983538	SEMA4A	0.364097	0.141223	0.559509	0.0638164	-0.195412
cg02706575	CCL13	0.532243	0.144978	0.72833	0.0617303	-0.196087
cg19486673	LILRA2	0.238325	0.133151	0.434838	0.0571081	-0.196513
cg06123346	ATP4A	0.319296	0.137262	0.516	0.0597162	-0.196704
cg22759185	REEP6	0.500143	0.13506	0.697037	0.0573639	-0.196894
cg17240454	SPDEF	0.567187	0.137771	0.764958	0.0492988	-0.197771
cg06436504	DOC1	0.575598	0.157192	0.773925	0.0415441	-0.198327
cg15357945	PRG2	0.377616	0.121167	0.576347	0.0202991	-0.198732
cg18997129	EPHA1	0.384682	0.0817363	0.5835	0.0379396	-0.198818
cg05989054	GAMT	0.342151	0.13186	0.541173	0.106867	-0.199023
cg27465569	PUS7L	0.636306	0.160018	0.835871	0.0282802	-0.199565
cg26045434	HR	0.260561	0.134453	0.460407	0.0558079	-0.199845
cg25162301	AHSG	0.651032	0.191426	0.851687	0.0166379	-0.200655
cg00168942	CX40.1	0.503706	0.12407	0.704554	0.0270558	-0.200848
cg17405586	KRT1	0.478976	0.14086	0.679969	0.0208807	-0.200993
cg26164184	FCN2	0.726319	0.20839	0.927671	0.0136676	-0.201352
cg17127769	LCP2	0.364201	0.13544	0.565662	0.0449582	-0.201461
cg08124722	CCL7	0.685624	0.181852	0.88738	0.0144297	-0.201757
cg21808053	DIRAS3	0.404936	0.163447	0.606726	0.0458459	-0.20179
cg21789545	COL9A1	0.375736	0.15349	0.577812	0.0300064	-0.202077
cg17288121	DEFB103A	0.584589	0.14585	0.786873	0.0649713	-0.202284
cg04797496	PCDH12	0.671142	0.151305	0.873586	0.0249591	-0.202443
cg26511075	FLJ25422	0.552699	0.14887	0.755404	0.043589	-0.202704
cg01731341	FGF6	0.711054	0.178797	0.913761	0.0246679	-0.202706
cg26206598	PREX1	0.482614	0.128829	0.685485	0.0390016	-0.202871
cg04956511	PTPN6	0.373374	0.0990326	0.577158	0.0587622	-0.203784
cg22862656	SCGB2A2	0.546177	0.144028	0.750031	0.0587933	-0.203853
cg10503138	CNTN4	0.522824	0.146562	0.727054	0.0401309	-0.20423
cg13018903	FLJ25530	0.596918	0.145251	0.801687	0.0314782	-0.204769
cg11521325	FLJ32926	0.415266	0.122951	0.620123	0.0245225	-0.204858
cg19226099	MC3R	0.451779	0.163257	0.657159	0.0625527	-0.205381
cg10370591	TPO	0.557093	0.143137	0.763229	0.0145521	-0.206136
cg02721374	OR1D2	0.585665	0.146189	0.791961	0.0306941	-0.206296
cg10774440	LEFTY1	0.55356	0.190571	0.759899	0.0699113	-0.206339
cg01656853	FUT2	0.270557	0.0932093	0.477022	0.0612202	-0.206465
cg22442090	GIMAP5	0.466205	0.12875	0.672698	0.0466365	-0.206493
cg07841014	REG1B	0.644724	0.146148	0.851737	0.017074	-0.207013
cg14182690	RUNX3	0.62491	0.152987	0.833092	0.025041	-0.208182
cg09196959	TRIM40	0.400878	0.125392	0.609494	0.0427817	-0.208617
cg24506604	LOC144501	0.427431	0.140026	0.636979	0.0600896	-0.209548
cg08097973	NUMA1	0.491642	0.160343	0.701513	0.0569401	-0.209871
cg21094154	TNFSF11	0.568915	0.13558	0.779155	0.0492306	-0.21024
cg09837943	ZIM2	0.554857	0.157652	0.765384	0.0480591	-0.210527
cg21307628	URB	0.488337	0.148523	0.699259	0.0413597	-0.210921
cg06771126	HOP	0.259936	0.0713104	0.470934	0.0920321	-0.210997
cg26151675	CNR2	0.34115	0.110322	0.552981	0.0415675	-0.211831
cg25391023	BTNL2	0.441219	0.125394	0.653661	0.0500348	-0.212442
cg24355048	CTSG	0.503281	0.16292	0.715929	0.0421585	-0.212648
cg25072962	MGC35295	0.492886	0.130281	0.705971	0.036415	-0.213085
cg13897627	FLJ44674	0.522852	0.137004	0.736351	0.0339263	-0.213499
cg18192417	NEBL	0.202593	0.0700832	0.416478	0.0565427	-0.213885
cg15779716	CDCP1	0.446399	0.13532	0.660332	0.0346505	-0.213934
cg24495017	PITX1	0.373359	0.144515	0.587491	0.0551205	-0.214132
cg12971694	CD72	0.57409	0.182052	0.788282	0.0234078	-0.214192
cg22692158	PRB4	0.643937	0.169683	0.858164	0.0382666	-0.214227
cg10667970	FBXO6	0.19275	0.06186	0.407311	0.0120185	-0.214561
cg10129493	CD33	0.627473	0.194172	0.842355	0.0451256	-0.214882
cg21003606	CALN1	0.686406	0.176855	0.901657	0.0198185	-0.215251
cg19526600	DIO1	0.47601	0.174417	0.691981	0.0591096	-0.215971
cg00134787	MYH1	0.531283	0.120442	0.747282	0.0602159	-0.215999
cg03973663	LYN	0.302823	0.135526	0.518856	0.0771347	-0.216032
cg07337598	ANXA9	0.464255	0.149393	0.680305	0.0623905	-0.21605
cg10318258	RIPK3	0.612505	0.130224	0.828727	0.0496393	-0.216222
cg16979445	NRM	0.56645	0.158546	0.782799	0.0481142	-0.216349
cg25384595	LILRA1	0.341333	0.10304	0.557973	0.0340399	-0.21664
cg18839416	C1orf158	0.423491	0.136998	0.640307	0.0195793	-0.216816
cg13038560	FLJ22555	0.612237	0.144257	0.82912	0.047082	-0.216883
cg11802013	CCND1	0.647191	0.163996	0.864667	0.0395548	-0.217476
cg24642468	MGC33367	0.383854	0.131837	0.601681	0.0765535	-0.217827
cg22194129	CLEC4C	0.5083	0.156884	0.727338	0.0338276	-0.219038
cg07897701	ABP1	0.662289	0.179532	0.881424	0.0145475	-0.219135
cg04995095	CD300E	0.341076	0.161334	0.560307	0.047739	-0.219232
cg13364756	CYP3A43	0.511117	0.136834	0.730364	0.0441	-0.219247
cg02589695	RASSF5	0.213839	0.0913151	0.433675	0.0340508	-0.219836
cg20840847	APBA2	0.620581	0.176775	0.840654	0.0278782	-0.220074
cg20895028	CDH26	0.605734	0.154999	0.827671	0.0248339	-0.221938
cg11512771	ECM1	0.661909	0.178177	0.884722	0.0172485	-0.222814
cg02786019	TRPV6	0.437001	0.146087	0.660016	0.0697211	-0.223015
cg02100848	C3orf32	0.586666	0.155609	0.809808	0.0375356	-0.223142
cg23283495	IRF6	0.127292	0.0654854	0.35054	0.0932138	-0.223248
cg21457804	CT45-2	0.61505	0.212517	0.838836	0.029894	-0.223786
cg26509022	ALDH1A3	0.285942	0.177924	0.509743	0.0629777	-0.223802
cg27420123	FSHB	0.344224	0.143902	0.568612	0.066535	-0.224387
cg18462653	DEFB119	0.30611	0.143746	0.530579	0.0816256	-0.224469
cg08784110	MAS1	0.499315	0.10766	0.724844	0.0455497	-0.225529
cg27513764	EFCAB3	0.506426	0.183076	0.732252	0.0365312	-0.225826
cg08996413	SLA	0.446561	0.167837	0.672388	0.0209927	-0.225827
cg26946769	MAPK4	0.524596	0.146571	0.750785	0.0383607	-0.22619
cg26377677	FURIN	0.606553	0.190069	0.832993	0.0419576	-0.22644
cg27244482	CAMK2A	0.597279	0.142419	0.824643	0.0340316	-0.227363
cg10758292	DEFA1	0.625111	0.166524	0.853038	0.0364121	-0.227927
cg04057858	UNQ9391	0.478704	0.126775	0.706948	0.0428871	-0.228244
cg23743472	C11orf38	0.560563	0.143454	0.789741	0.0383735	-0.229177
cg09451092	CCDC19	0.684148	0.142957	0.914432	0.0256551	-0.230284
cg02067021	DNAJC5B	0.434858	0.17861	0.66585	0.0415286	-0.230992
cg25943276	C11orf39	0.612287	0.142392	0.844129	0.0406648	-0.231841
cg14620221	OR8B8	0.598379	0.15506	0.830427	0.016603	-0.232048
cg02477931	C11orf39	0.533947	0.153732	0.766508	0.0179911	-0.232561
cg08475088	NALP9	0.641347	0.187807	0.87422	0.0209465	-0.232873
cg01785568	MSX1	0.597241	0.181277	0.830532	0.0529351	-0.233291
cg07326586	UBD	0.365698	0.124816	0.599108	0.0753233	-0.23341
cg10071275	MYT1	0.485072	0.149632	0.718515	0.0361623	-0.233444
cg02838492	KIF12	0.488827	0.157767	0.722497	0.0425531	-0.233671
cg22951794	OR10A5	0.520053	0.160113	0.753971	0.0427113	-0.233918
cg15979932	CUEDC1	0.413195	0.15166	0.64747	0.0569633	-0.234275
cg18888403	HMGCL	0.56672	0.152767	0.801046	0.0702515	-0.234326
cg03503295	DNAH5	0.567916	0.179407	0.802867	0.0572347	-0.234951
cg24408313	BCL2	0.26816	0.108474	0.503621	0.0604296	-0.23546
cg05037688	EGFL7	0.318442	0.163609	0.554103	0.0333702	-0.235661
cg03741352	LCE3C	0.557405	0.189447	0.79345	0.0322128	-0.236046
cg06415153	PITPNM2	0.360834	0.119545	0.598161	0.0576979	-0.237327
cg13447818	FLG	0.55642	0.184648	0.793747	0.0317589	-0.237327
cg08214029	CCL18	0.327175	0.137873	0.56454	0.0345612	-0.237365
cg11206634	SFT2D3	0.471758	0.164431	0.709334	0.0490179	-0.237576
cg00718513	NA	0.357494	0.138258	0.595317	0.0480065	-0.237823
cg07947016	KLK2	0.330352	0.152806	0.568248	0.0423304	-0.237895
cg20556988	CCL1	0.614564	0.189349	0.853597	0.0377992	-0.239033
cg06437862	TUBA2	0.584542	0.192175	0.823799	0.0538272	-0.239256
cg02121427	LRRC15	0.311626	0.114715	0.550983	0.0467636	-0.239357
cg25082710	IVL	0.308771	0.120287	0.548414	0.0415235	-0.239642
cg25033144	FLJ00060	0.611417	0.196033	0.851866	0.0398556	-0.24045
cg26353877	APCS	0.544414	0.173095	0.785069	0.0357762	-0.240655
cg11819637	THPO	0.499992	0.137386	0.741335	0.0447455	-0.241343
cg06119575	TAL2	0.445133	0.1342	0.688963	0.0711584	-0.24383
cg00298951	CMKLR1	0.602755	0.194851	0.846986	0.0316569	-0.244231
cg22346765	UNC5CL	0.548199	0.163967	0.79286	0.0274642	-0.244661
cg17761453	LOR	0.615758	0.220712	0.860442	0.020432	-0.244684
cg24272559	LOC116123	0.444285	0.14477	0.690711	0.0626104	-0.246426
cg26829529	SPACA3	0.307112	0.141682	0.55441	0.045943	-0.247298
cg19863740	PARVG	0.516601	0.182224	0.763963	0.0572686	-0.247362
cg23213217	DEGS1	0.3273	0.123144	0.575416	0.0869752	-0.248116
cg13944141	PRSS2	0.461005	0.141962	0.709389	0.0652647	-0.248385
cg00918005	REG3G	0.507483	0.1615	0.756004	0.0407557	-0.248522
cg11245384	PDYN	0.464239	0.189971	0.712992	0.0272388	-0.248753
cg23984130	NA	0.609593	0.158682	0.858754	0.0199538	-0.249161
cg23216015	C7orf16	0.451011	0.17195	0.700245	0.0438038	-0.249235
cg14886269	TNFRSF18	0.204399	0.126208	0.45469	0.0740206	-0.250291
cg04988978	MPO	0.398805	0.180515	0.649845	0.0838707	-0.251041
cg21137417	SPP2	0.523416	0.126255	0.774719	0.0537951	-0.251303
cg27015047	DMBT1	0.550236	0.117715	0.801623	0.0526427	-0.251387
cg09448880	PGLYRP3	0.460061	0.18791	0.712158	0.0220523	-0.252097
cg13696012	BPIL1	0.469983	0.158614	0.72242	0.0455568	-0.252437
cg24459209	PRG3	0.428236	0.129223	0.681562	0.052407	-0.253325
cg18818531	FOSL1	0.358104	0.149196	0.612197	0.0631287	-0.254093
cg05440289	IVL	0.560483	0.174892	0.815829	0.0325344	-0.255346
cg04947157	TMC6	0.378481	0.190622	0.634	0.093095	-0.255519
cg20832020	VSIG9	0.500556	0.132331	0.756942	0.0324772	-0.256387
cg12610744	KRT4	0.487159	0.133885	0.743721	0.0428311	-0.256562
cg27383956	FLJ13265	0.548858	0.178149	0.805712	0.0483426	-0.256855
cg02880679	MBTD1	0.510776	0.164951	0.767838	0.0567471	-0.257062
cg27342801	REG3A	0.517937	0.170895	0.775594	0.0388451	-0.257657
cg22478614	DEFB4	0.55395	0.19301	0.811832	0.0489491	-0.257882
cg27412093	CAPN9	0.600631	0.19495	0.859563	0.0237952	-0.258932
cg16363586	BST2	0.360709	0.180649	0.621171	0.0641116	-0.260462
cg24625388	NEBL	0.360537	0.0898383	0.621217	0.0364987	-0.260679
cg01072821	UNQ9391	0.456465	0.174595	0.717589	0.0696771	-0.261125
cg25214366	DEFB103A	0.56999	0.182762	0.83127	0.0246318	-0.26128
cg17667972	KRT4	0.553171	0.149928	0.814911	0.0376066	-0.261741
cg05859264	MAPK13	0.299717	0.102585	0.561877	0.0764771	-0.26216
cg12348970	SLC24A2	0.572471	0.159065	0.834964	0.0464454	-0.262493
cg11037787	PLA2G2A	0.527474	0.163244	0.79069	0.0587812	-0.263216
cg04457051	SCOC	0.458373	0.149051	0.721994	0.0634964	-0.263621
cg02674804	REEP6	0.51307	0.172053	0.776744	0.0760805	-0.263674
cg26259865	LOC124220	0.522218	0.169229	0.78608	0.0487463	-0.263862
cg07705908	SPDEF	0.392733	0.173834	0.657183	0.0757043	-0.26445
cg14161885	NBPF15	0.398367	0.161581	0.663155	0.041813	-0.264787
cg06940107	C21orf100	0.569672	0.148078	0.835953	0.0264602	-0.26628
cg03003745	UNQ473	0.372148	0.169952	0.639611	0.0504608	-0.267463
cg10636246	AIM2	0.348004	0.181749	0.617856	0.063699	-0.269852
cg12878228	PRSS1	0.475638	0.214645	0.747225	0.0367054	-0.271587
cg27446185	VTCN1	0.501375	0.165952	0.775028	0.0315416	-0.273653
cg02643667	TFF1	0.608748	0.170708	0.883758	0.0404193	-0.27501
cg11435943	SERPINB12	0.477867	0.177629	0.75346	0.0500813	-0.275593
cg19728382	STC2	0.583451	0.212204	0.85936	0.0472469	-0.275909
cg15975283	SLC9A11	0.524343	0.212004	0.800819	0.0349317	-0.276476
cg22268164	TRHR	0.492299	0.212512	0.772263	0.0437179	-0.279964
cg09847584	RIMBP2	0.635827	0.176634	0.916545	0.0217788	-0.280718
cg09793866	STAR	0.521958	0.206166	0.802822	0.0366835	-0.280864
cg01962826	GRM4	0.562441	0.20022	0.843449	0.037608	-0.281008
cg02148642	RGPD5	0.329381	0.142632	0.611693	0.0765476	-0.282312
cg17771150	LCP1	0.351262	0.142488	0.634816	0.062111	-0.283555
cg15051063	NA	0.642126	0.225462	0.925748	0.0141093	-0.283622
cg06276653	C8ORFK32	0.539773	0.208102	0.824165	0.0365954	-0.284392
cg11750883	C1orf42	0.410496	0.200308	0.69558	0.0643538	-0.285084
cg26922202	OR2S2	0.461272	0.155043	0.746568	0.0603769	-0.285295
cg07039113	S100A9	0.482468	0.20404	0.770431	0.0601512	-0.287963
cg01109219	RASGRP3	0.512579	0.142442	0.801429	0.0584523	-0.28885
cg14023451	GPLD1	0.443345	0.189067	0.736276	0.0668452	-0.292932
cg16772207	MYT1	0.503168	0.173016	0.798649	0.0316428	-0.295482
cg03602500	FLJ00060	0.49051	0.144923	0.787007	0.0387535	-0.296497
cg17699374	MGC35206	0.370225	0.152041	0.668702	0.0312558	-0.298477
cg07525077	RNASE3	0.394504	0.143492	0.694302	0.0298326	-0.299798
cg17657618	FLJ43806	0.379012	0.142335	0.67887	0.0446467	-0.299858
cg10883352	NA	0.590341	0.179913	0.891212	0.0415837	-0.300871
cg05181279	RIG	0.564597	0.184804	0.867299	0.0324294	-0.302701
cg00619207	DENND2D	0.407365	0.136771	0.71231	0.0445313	-0.304945
cg04717045	CCND1	0.560991	0.21343	0.868375	0.043835	-0.307384
cg00019495	HOP	0.266016	0.0861692	0.577718	0.0817537	-0.311702
cg17399166	CD1D	0.575644	0.238079	0.88899	0.0240832	-0.313346
cg05606799	KISS1	0.419009	0.149066	0.734957	0.0286407	-0.315948
cg02723533	CCND1	0.635275	0.241716	0.953624	0.0425292	-0.318349
cg13311440	CD48	0.328419	0.202184	0.651046	0.027814	-0.322627
cg26390526	FLG	0.503863	0.211894	0.827662	0.0345668	-0.323799
cg03109316	ZNF80	0.563458	0.230304	0.891091	0.0322355	-0.327633
cg16744741	PRKG2	0.517553	0.199549	0.850509	0.0188604	-0.332956
cg09037813	LRRFIP1	0.469263	0.201514	0.804615	0.0357481	-0.335351
cg19814116	KCNAB2	0.379705	0.153273	0.71638	0.043505	-0.336675
cg18552413	DARC	0.307271	0.172107	0.653885	0.0577008	-0.346613
cg24641737	DENND2D	0.282512	0.148973	0.632098	0.0512024	-0.349586
cg11003133	AIM2	0.309649	0.143388	0.664037	0.0663392	-0.354388
cg27610561	SLC2A10	0.519656	0.229791	0.878007	0.0629527	-0.358351
